# Supplementary material for: Use of Endogenous Retroviral Sequences (ERVs) and structural markers for retroviral phylogenetic inference and taxonomy
Source: PubMed Central journal article supplement (PMC1224870; doi:10.1186/1742-4690-2-50), 2005-08-10

# Selected RetroTector<sup>®</sup> outputs

Selected endogenous retroviruses (ERVs) and exogenous retroviruses (XRVs) extracted from the human genome (hg16), chicken genome (gg01) and from annotations in GenBank.

(Graphic display of LTRs depend on the availability of full LTRs [U5-R-U3].)

(Graphic display quality of ERVs depend on their ages [accumulated mutations])

## Legend

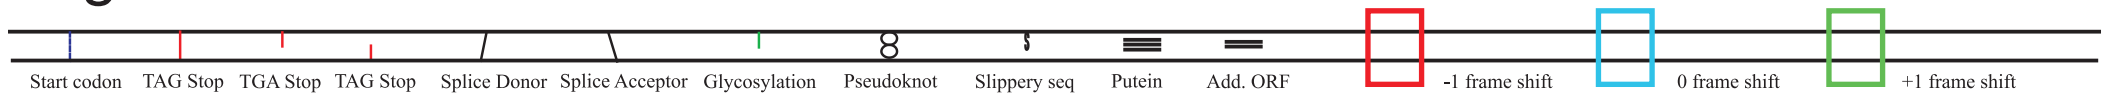

## Motifs

5LT 5'LTR

PBS Primer binding site

Gag Group specific antigen

MA1, MA2..... Matrix  
 CA0, CA1, CA2..... Capsid  
 NC1, NC2..... Nucleocapsid (zinc fingers)

Pro Protease

DU0, DU1, DU2..... dUTPase (deoxyuridine triphosphatase)  
 PR1, PR2, PR3..... Protease

Pol Polymerase

RT1, RT2, RT3, RT4, RT5, RT6..... Reverse transcriptase  
 DL1, DL2..... dUTPase (deoxyuridine triphosphatase)  
 In1, IN2, IN3, IN4, IN5, IN6, IN7..... Integrase

Env Envelope

SU2, SU3..... Surface unit  
 TM2, TM3, TM4, TM5..... Transmembrane protein

PPT Polypurine tract

3LT 3'LTR

# Errantivirus

U15406\_Cer1-Gypsy

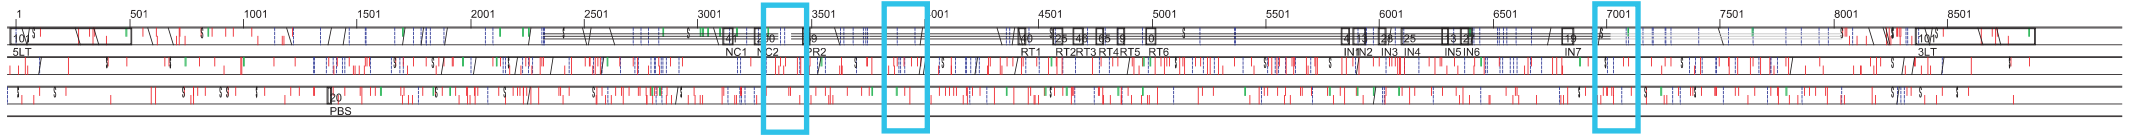

# Alpha

RSV-J02342

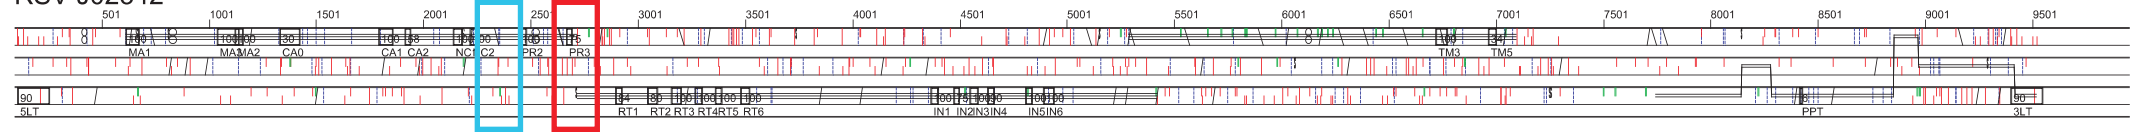

Gg01Chr1\_150479332\_Alpha

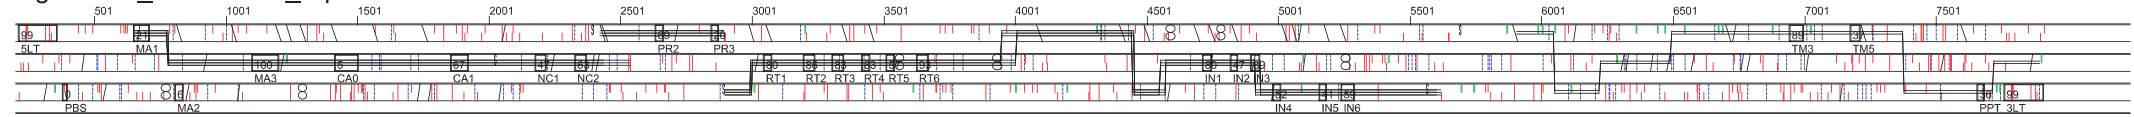

Gg01Chr1\_156168845\_Alpha

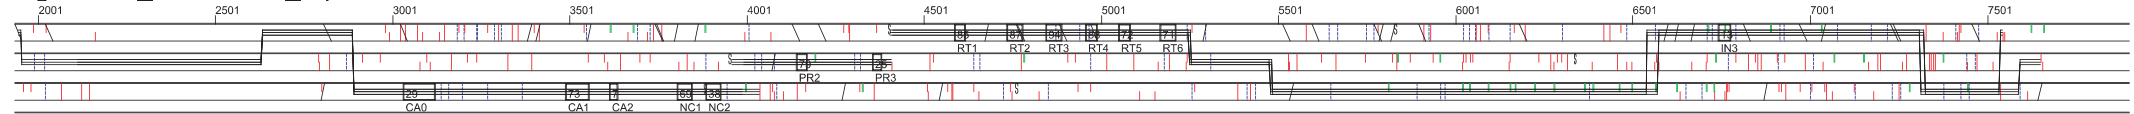

# Intermediate Alpha-beta

PyERV-AF500296

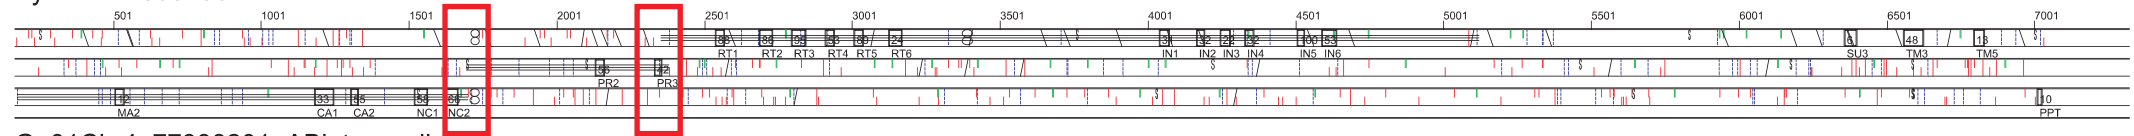

Gg01Chr4\_77338201\_ABintermediate

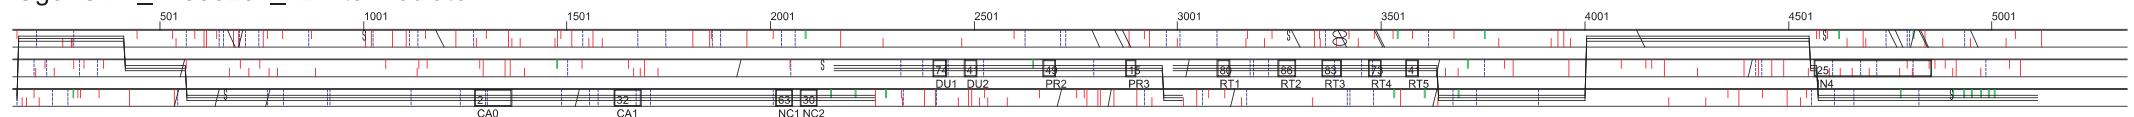

Gg01Chr11r\_209284\_ABintermediate

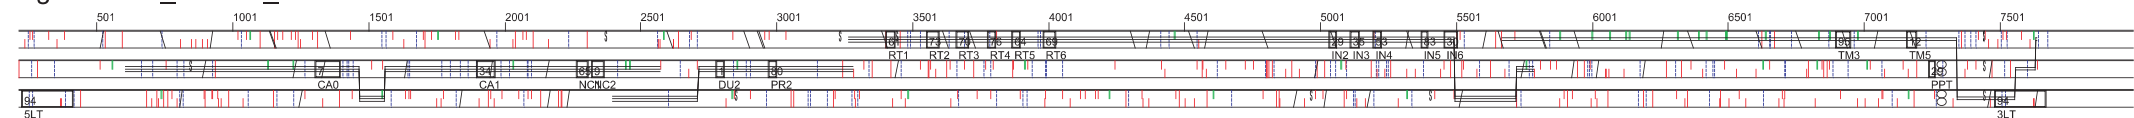

# Beta

## NC\_001503\_MMTV

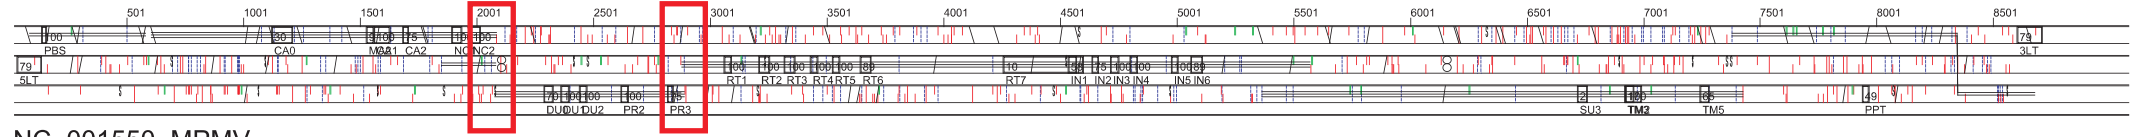

## NC\_001550\_MPMV

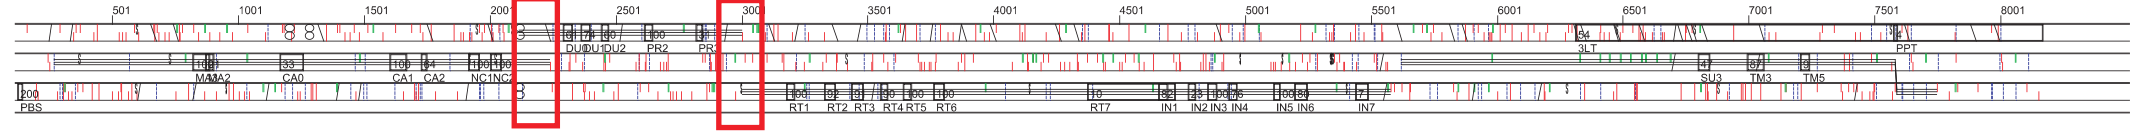

# Gamma

## MoMLV-J02255

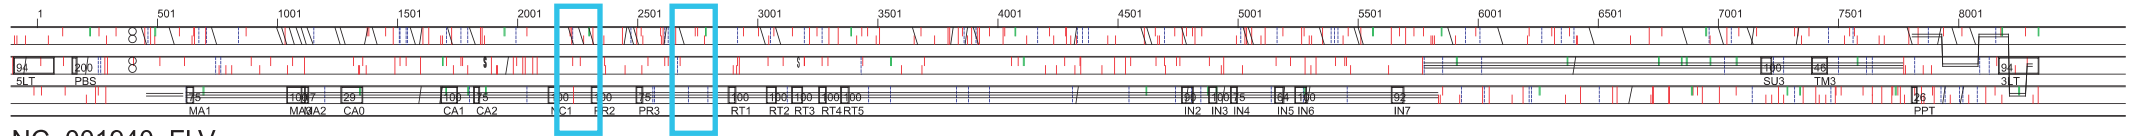

## NC\_001940\_FLV

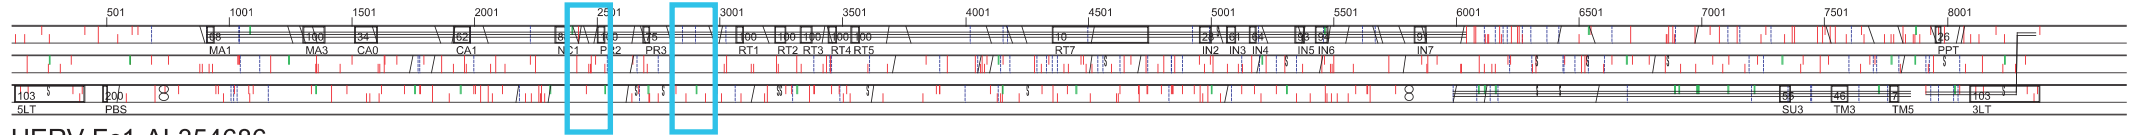

## HERV-Fc1-AL354686

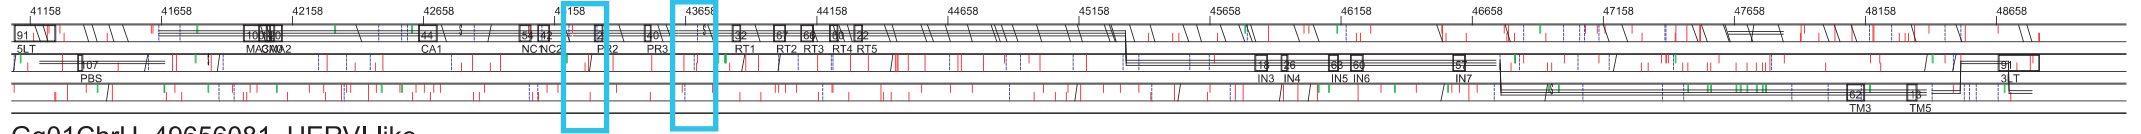

## Gg01ChrU\_49656081\_HERVI-like

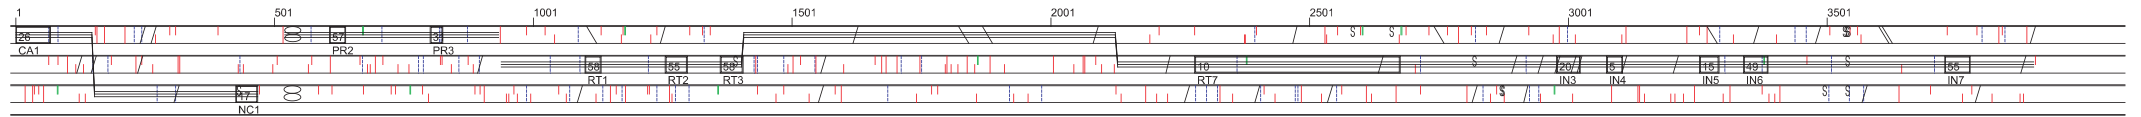

## Gg01ChrU\_126703652\_HERVE-like

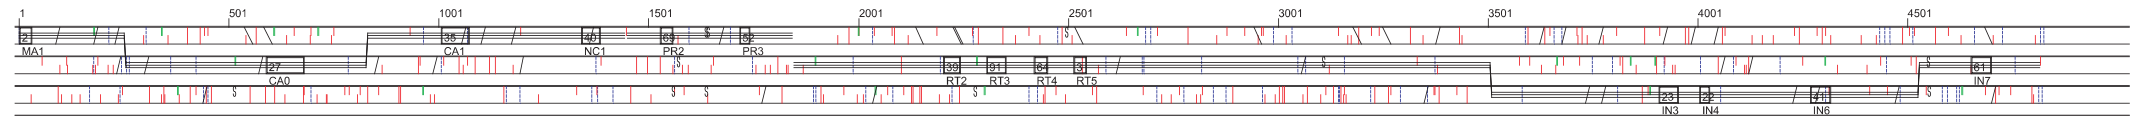

# Delta

HTLV2-M10060

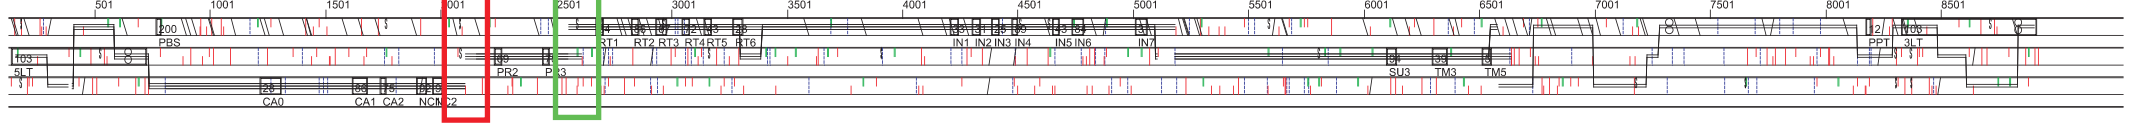

# Epsilon

NC\_001867\_WDSV

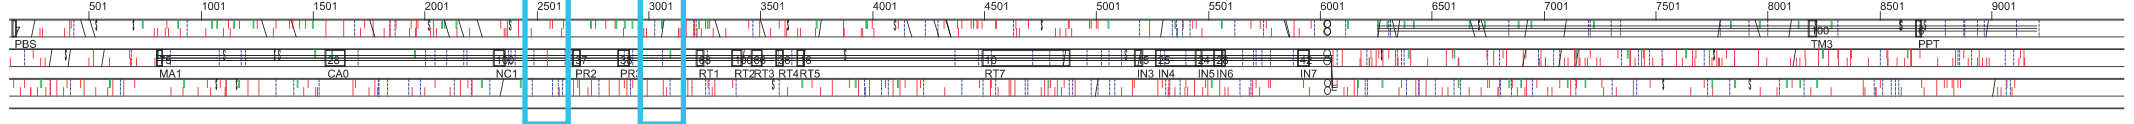

# Intermediate Epsilon like

NC\_001724\_SnRV

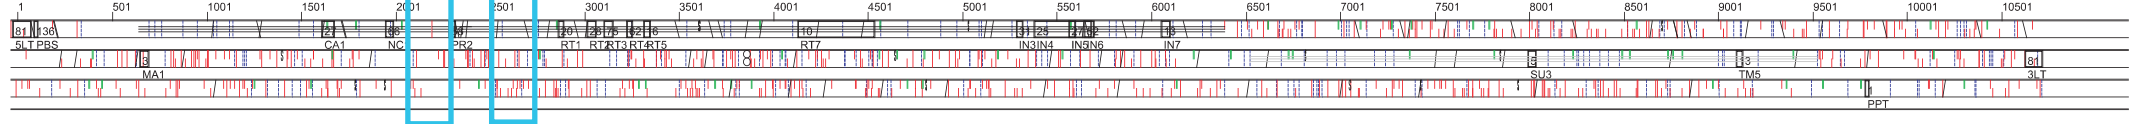

# Lenti

NC\_001802\_HIV1

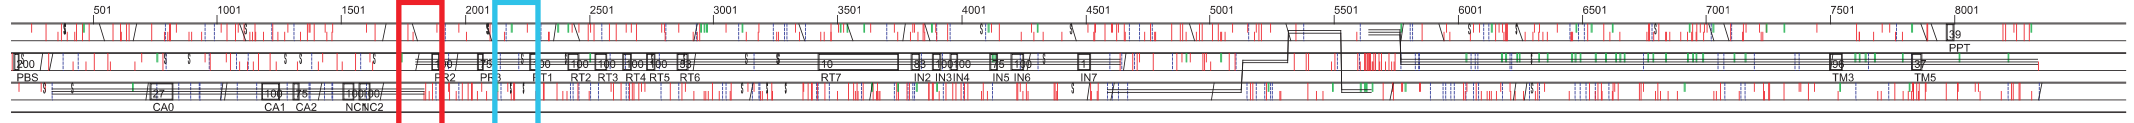

# Spumalike

NC\_001736\_HFV

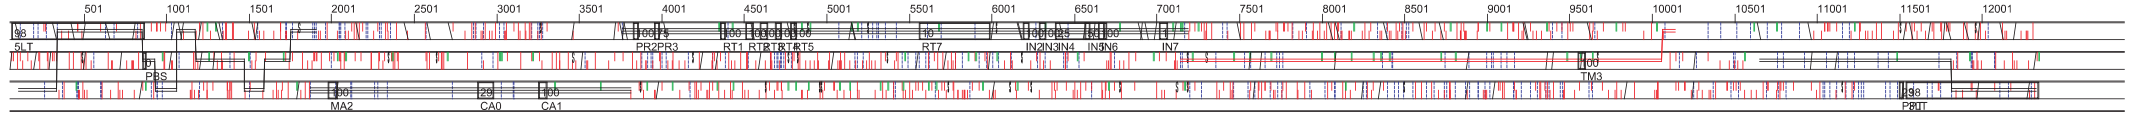

Gg01Chr4\_48130894\_Spumalike

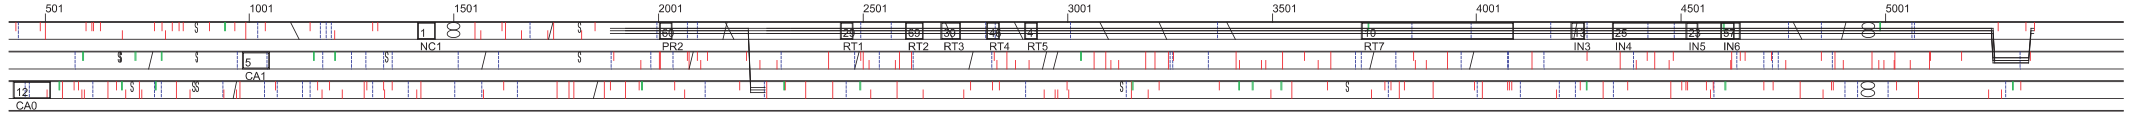

Supplement: 1742-4690-2-50-S2.pdf [file 1742-4690-2-50-S2.pdf]
