# Supplementary material for: Use of Endogenous Retroviral Sequences (ERVs) and structural markers for retroviral phylogenetic inference and taxonomy
Source: PubMed Central journal article supplement (PMC1224870; doi:10.1186/1742-4690-2-50), 2005-08-10

# Selected RetroTector<sup>®</sup> RT and IN Motifs from the Pol alignment with WebLogo consensus

|                      | RT1        | RT4        | RT5         | IN2 and IN3 (HCC)                              | IN5               | IN6                   |
|----------------------|------------|------------|-------------|------------------------------------------------|-------------------|-----------------------|
| HERV-S               | YHFPVWVVK  | FHYIDDMIL  | GWTINESKVQ  | LHRKLRHGGGWNWNCN-RS-VGAELSLPSQDILEAQCQKCSACTQA | SLAIESDRRTHFT---  | HVSYNPQTITGMIEQHS-ILK |
| gg01-Chr4-48130894   | YNSPIWVVK  | FHYIDDMIL  | GWAINDPKVQ  | LHRKLRHAGQKTMAAANKA-WGLPIQLP--DIVQACQDCDCASRM  | PEVIESDQGTHTFT--- | HLPYNPQTGAGLIERYNGLK  |
| HERV-L               | FNSPIWVVK  | VHYIDDMIL  | GWEINPTKIQ  | AHEQSGHGRMEVMHG----LSNMDPLTKADLAMATAECPICQOE   | PHSIASDQGTHTFT--- | HVPHPPEAAGLIERWNLK    |
| pt01-Chr5-53871501   | ZNTPLLPVKK | LQYVDDLLA  | GYRASAKKAQ  | MHAWTHLSKKKRLLEIEK---TDFLIPRVGTLLEQVTLACKACQOV | PKVIGSDNGPAFVSQV  | HCAYPQSSSGQVERMNRITK  |
| BaEV                 | WNTPLLPVKK | LQYVDDLLA  | GYRASAK-AQ  | MHAWTHLGRKRLLEIEK---TDFLIPRSTLLEQVTSACKVCQOV   | PKVIGSDNGPAFVSQV  | HCAYPQSSSGQVERMNRITK  |
| MLV                  | WNTPLLPVKK | LQYVDDLLA  | GYRASAK-AQ  | LHQVTLHLSFSKMKALLERSHSPYMLNDRRLTNNITETCKACAQV  | PQVLGTDNGPAFVSKV  | HCAYPQSSSGQVERMNRITK  |
| FLV                  | WNTPLLPVKK | LQYVDDLLA  | GYRASAKKAQ  | LHKLTHLGRKMKTLLEREETGYPVLRNDRHLRQVTECRACAQI    | PQVLGSDNGPAFVSQV  | HCAYPQSSSGQVERMNRITK  |
| GalV                 | YNTPLLPVKK | LQYVDDLLA  | GYRASAK-AQ  | LHQVTLHLSFSKMKALLERSHSPYMLNDRRLTNNITETCKACAQV  | PKVIGSDNGPAFVSQV  | HCAYPQSSSGQVERMNRITK  |
| PERV                 | WNTPLLPVKK | LQYVDDLLA  | GYRASAKKAQ  | IHRHTLHGRKMKTLLEREETGYPVLRNDRHLRQVTECRACAQI    | PKVIGSDNGPAFVSQV  | HCAYPQSSSGQVERMNRITK  |
| pt01-Chr10r-17119458 | YNTPLLPVKK | LQYVDDLLA  | GYRASAKKAQ  | IHRHTLHGRKMKTLLEREETGYPVLRNDRHLRQVTECRACAQI    | PKVIGSDNGPAFVSQV  | HCAYPQSSSGQVERMNRITK  |
| HERV-T               | WNTPLLPVKK | LQYVDDLLA  | GYRASAKKAQ  | IHRHTLHGRKMKTLLEREETGYPVLRNDRHLRQVTECRACAQI    | PKVIGSDNGPAFVSQV  | HCAYPQSSSGQVERMNRITK  |
| ERV-3                | WNTPLLPVKK | LQYVDDLLA  | GYRASAKKAQ  | IHRHTLHGRKMKTLLEREETGYPVLRNDRHLRQVTECRACAQI    | PKVIGSDNGPAFVSQV  | HCAYPQSSSGQVERMNRITK  |
| HERV-E               | WNTPLLPVKK | LQYVDDLLA  | GYRASAKKAQ  | IHRHTLHGRKMKTLLEREETGYPVLRNDRHLRQVTECRACAQI    | PKVIGSDNGPAFVSQV  | HCAYPQSSSGQVERMNRITK  |
| gg01-ChrU-126703652  | YSITILPVVK | LQYVDDLLA  | GYRASAKKAQ  | IHRHTLHGRKMKTLLEREETGYPVLRNDRHLRQVTECRACAQI    | PKVIGSDNGPAFVSQV  | HCAYPQSSSGQVERMNRITK  |
| HERV-ADP             | YNTPLLPVKK | LQYVDDLLA  | GYRASAKKAQ  | IHRHTLHGRKMKTLLEREETGYPVLRNDRHLRQVTECRACAQI    | PKVIGSDNGPAFVSQV  | HCAYPQSSSGQVERMNRITK  |
| gg01-ChrU-49656081   | FNTPLPVKKS | LQYVDDLLS  | GLRVSKNKKQ  | LHQGSHWGPQALCDAILR---NYVCIGIZTLTKQVGCSCVICQSL  | VEHIDSHQGSHTFQV   | HIPWHLSSSRVERMNRITK   |
| HERV-I               | YNTPLPVKKS | LQYVDDLLS  | GLRVSKNKKQ  | LHQGSHWGPQALCDAILR---NYVCIGIZTLTKQVGCSCVICQSL  | VEHIDSHQGSHTFQV   | HIPWHLSSSRVERMNRITK   |
| HERV-Hconsensus      | YNSPILPVKQ | IQYIDDLIC  | GYRVSPSKAQ  | FHNLHVGVKPLARLLEP---LISFSPWSKILKEITSQCSICYST   | PTSISQSDNGPAFTSQI | HIPYHPQSSGKVERTNGLK   |
| HERVH-RGH2           | IQYIDGVLV  | ---        | ---         | FHNLHVGVKPLARLLEP---LISFSPWSKILKEITSQCSICYST   | PTSISQSDNGPAFTSQI | HIPYHPQSSGKVERTNGLK   |
| HERVH-RTVLH2         | IYHSPILPVK | ---        | ---         | FHNLHVGVKPLARLLEP---LISFSPWSKILKEITSQCSICYST   | PTSISQSDNGPAFTSQI | HIPYHPQSSGKVERTNGLK   |
| HERV-Fc1             | CNTPLPVKKS | LQYVDDLLC  | GYRVTPPKAQ  | VHKTLLHGPELLEKLLG---YFYIHSLSALAKTVTRQVTCRQH    | PLRIGSDNGPVLVADL  | HAAYPQSSSGQVERMNRITK  |
| HERV-Fc2             | CNTPLPVKKS | LQYVDDLLC  | GYRVTPPKAQ  | VHKTLLHGPELLEKLLG---YFYIHSLSALAKTVTRQVTCRQH    | PLRIGSDNGPVLVADL  | HAAYPQSSSGQVERMNRITK  |
| HERV-W               | CSTPILGVKQ | SGVDDLLC   | GYMVSQPKAQ  | VHKTLLHGPELLEKLLG---YFYIHSLSALAKTVTRQVTCRQH    | PLRIGSDNGPVLVADL  | HAAYPQSSSGQVERMNRITK  |
| HERV-FRD             | CNTPLILVKK | LQYVDDLLC  | RYKVSQKAKTQ | VHKTLLHGPELLEKLLG---YFYIHSLSALAKTVTRQVTCRQH    | PLRIGSDNGPVLVADL  | HAAYPQSSSGQVERMNRITK  |
| MER4like             | CNTPLILVKK | LQYVDDLLC  | RYKVSQKAKTQ | VHKTLLHGPELLEKLLG---YFYIHSLSALAKTVTRQVTCRQH    | PLRIGSDNGPVLVADL  | HAAYPQSSSGQVERMNRITK  |
| WDSV                 | CNTPLILVKK | LQYVDDLLC  | RYKVSQKAKTQ | VHKTLLHGPELLEKLLG---YFYIHSLSALAKTVTRQVTCRQH    | PLRIGSDNGPVLVADL  | HAAYPQSSSGQVERMNRITK  |
| hg15-chr3-152465283  | CNTPIFPVKK | CIYMDVLLA  | GKVSQKSKSZ  | VHKTLLHGPELLEKLLG---YFYIHSLSALAKTVTRQVTCRQH    | PLRIGSDNGPVLVADL  | HAAYPQSSSGQVERMNRITK  |
| Xen1                 | CNTPLPVKKS | LQYVDDLLC  | GCKASKEKLLQ | VHKTLLHGPELLEKLLG---YFYIHSLSALAKTVTRQVTCRQH    | PLRIGSDNGPVLVADL  | HAAYPQSSSGQVERMNRITK  |
| ALV                  | WNTPIFPVKK | LQYVDDLLA  | GLTIAPDKIQ  | VHKTLLHGPELLEKLLG---YFYIHSLSALAKTVTRQVTCRQH    | PLRIGSDNGPVLVADL  | HAAYPQSSSGQVERMNRITK  |
| gg01-chr1-15616845   | WNTPIFPVKK | LQYVDDLLA  | GLTIAPDKIQ  | VHKTLLHGPELLEKLLG---YFYIHSLSALAKTVTRQVTCRQH    | PLRIGSDNGPVLVADL  | HAAYPQSSSGQVERMNRITK  |
| MFV                  | WNTPIFPVKK | LQYVDDLLA  | GLTIAPDKIQ  | VHKTLLHGPELLEKLLG---YFYIHSLSALAKTVTRQVTCRQH    | PLRIGSDNGPVLVADL  | HAAYPQSSSGQVERMNRITK  |
| JSRV                 | IHYMDLILA  | ---        | ---         | VHKTLLHGPELLEKLLG---YFYIHSLSALAKTVTRQVTCRQH    | PLRIGSDNGPVLVADL  | HAAYPQSSSGQVERMNRITK  |
| MMTV                 | WNTPIFPVKK | LQYVDDLLA  | GLTIAPDKIQ  | VHKTLLHGPELLEKLLG---YFYIHSLSALAKTVTRQVTCRQH    | PLRIGSDNGPVLVADL  | HAAYPQSSSGQVERMNRITK  |
| HML1                 | WNSPVFVVK  | IHYMDLILA  | GLTIAPDKIQ  | VHKTLLHGPELLEKLLG---YFYIHSLSALAKTVTRQVTCRQH    | PLRIGSDNGPVLVADL  | HAAYPQSSSGQVERMNRITK  |
| HML2                 | WNSPVFVVK  | IHYMDLILA  | GLTIAPDKIQ  | VHKTLLHGPELLEKLLG---YFYIHSLSALAKTVTRQVTCRQH    | PLRIGSDNGPVLVADL  | HAAYPQSSSGQVERMNRITK  |
| HML3                 | WNSPVFVVK  | IHYMDLILA  | GLTIAPDKIQ  | VHKTLLHGPELLEKLLG---YFYIHSLSALAKTVTRQVTCRQH    | PLRIGSDNGPVLVADL  | HAAYPQSSSGQVERMNRITK  |
| HML4                 | WNSPVFVVK  | IHYMDLILA  | GLTIAPDKIQ  | VHKTLLHGPELLEKLLG---YFYIHSLSALAKTVTRQVTCRQH    | PLRIGSDNGPVLVADL  | HAAYPQSSSGQVERMNRITK  |
| HML7                 | WNSPVFVVK  | IHYMDLILA  | GLTIAPDKIQ  | VHKTLLHGPELLEKLLG---YFYIHSLSALAKTVTRQVTCRQH    | PLRIGSDNGPVLVADL  | HAAYPQSSSGQVERMNRITK  |
| HML8                 | WNSPVFVVK  | IHYMDLILA  | GLTIAPDKIQ  | VHKTLLHGPELLEKLLG---YFYIHSLSALAKTVTRQVTCRQH    | PLRIGSDNGPVLVADL  | HAAYPQSSSGQVERMNRITK  |
| HML6                 | WNSPVFVVK  | IHYMDLILA  | GLTIAPDKIQ  | VHKTLLHGPELLEKLLG---YFYIHSLSALAKTVTRQVTCRQH    | PLRIGSDNGPVLVADL  | HAAYPQSSSGQVERMNRITK  |
| HML9                 | WNSPVFVVK  | IHYMDLILA  | GLTIAPDKIQ  | VHKTLLHGPELLEKLLG---YFYIHSLSALAKTVTRQVTCRQH    | PLRIGSDNGPVLVADL  | HAAYPQSSSGQVERMNRITK  |
| HML5                 | WNSPVFVVK  | IHYMDLILA  | GLTIAPDKIQ  | VHKTLLHGPELLEKLLG---YFYIHSLSALAKTVTRQVTCRQH    | PLRIGSDNGPVLVADL  | HAAYPQSSSGQVERMNRITK  |
| HML10                | WNSPVFVVK  | IHYMDLILA  | GLTIAPDKIQ  | VHKTLLHGPELLEKLLG---YFYIHSLSALAKTVTRQVTCRQH    | PLRIGSDNGPVLVADL  | HAAYPQSSSGQVERMNRITK  |
| Python-molurus       | YNTPIFPVKK | IHYMDLILA  | GLTIAPDKIQ  | VHKTLLHGPELLEKLLG---YFYIHSLSALAKTVTRQVTCRQH    | PLRIGSDNGPVLVADL  | HAAYPQSSSGQVERMNRITK  |
| gg01-Chr7-57353782   | YNTPIFPVKK | IHYMDLILA  | GLTIAPDKIQ  | VHKTLLHGPELLEKLLG---YFYIHSLSALAKTVTRQVTCRQH    | PLRIGSDNGPVLVADL  | HAAYPQSSSGQVERMNRITK  |
| gg01-ChrU-163504869  | YNTPIFPVKK | IHYMDLILA  | GLTIAPDKIQ  | VHKTLLHGPELLEKLLG---YFYIHSLSALAKTVTRQVTCRQH    | PLRIGSDNGPVLVADL  | HAAYPQSSSGQVERMNRITK  |
| HIV-1                | YNTPIFPVKK | IHYMDLILA  | GLTIAPDKIQ  | VHKTLLHGPELLEKLLG---YFYIHSLSALAKTVTRQVTCRQH    | PLRIGSDNGPVLVADL  | HAAYPQSSSGQVERMNRITK  |
| HIV-2                | YNTPIFPVKK | IHYMDLILA  | GLTIAPDKIQ  | VHKTLLHGPELLEKLLG---YFYIHSLSALAKTVTRQVTCRQH    | PLRIGSDNGPVLVADL  | HAAYPQSSSGQVERMNRITK  |
| Visna                | CNTPIFPVKK | IHYMDLILA  | GLTIAPDKIQ  | VHKTLLHGPELLEKLLG---YFYIHSLSALAKTVTRQVTCRQH    | PLRIGSDNGPVLVADL  | HAAYPQSSSGQVERMNRITK  |
| EIAV                 | YNSPILPVKQ | IHYMDLILA  | GLTIAPDKIQ  | VHKTLLHGPELLEKLLG---YFYIHSLSALAKTVTRQVTCRQH    | PLRIGSDNGPVLVADL  | HAAYPQSSSGQVERMNRITK  |
| HTLV-1               | GNNPVFVVK  | VQYMDLILA  | GLPIQSEKTKQ | VHKTLLHGPELLEKLLG---YFYIHSLSALAKTVTRQVTCRQH    | PLRIGSDNGPVLVADL  | HAAYPQSSSGQVERMNRITK  |
| HTLV-2               | GNNPVFVVK  | VQYMDLILA  | GLPIQSEKTKQ | VHKTLLHGPELLEKLLG---YFYIHSLSALAKTVTRQVTCRQH    | PLRIGSDNGPVLVADL  | HAAYPQSSSGQVERMNRITK  |
| BLV                  | GNNPVFVVK  | VQYMDLILA  | GLPIQSEKTKQ | VHKTLLHGPELLEKLLG---YFYIHSLSALAKTVTRQVTCRQH    | PLRIGSDNGPVLVADL  | HAAYPQSSSGQVERMNRITK  |
| HSRV                 | MNTPVYVVK  | QVYVDDIYL  | GYVSLKKSSE  | VHKTLLHGPELLEKLLG---YFYIHSLSALAKTVTRQVTCRQH    | PLRIGSDNGPVLVADL  | HAAYPQSSSGQVERMNRITK  |
| HV                   | MNTPVYVVK  | QVYVDDIYL  | GYVSLKKSSE  | VHKTLLHGPELLEKLLG---YFYIHSLSALAKTVTRQVTCRQH    | PLRIGSDNGPVLVADL  | HAAYPQSSSGQVERMNRITK  |
| HERV66               | VNSAIPVVK  | LQYVDDILL  | GVRINPKKSH  | VHKTLLHGPELLEKLLG---YFYIHSLSALAKTVTRQVTCRQH    | PLRIGSDNGPVLVADL  | HAAYPQSSSGQVERMNRITK  |
| Snrv                 | WNTPIFPVKK | IHYMDLILA  | GLTIAPDKIQ  | VHKTLLHGPELLEKLLG---YFYIHSLSALAKTVTRQVTCRQH    | PLRIGSDNGPVLVADL  | HAAYPQSSSGQVERMNRITK  |
| gg01-chr4-77338201   | WNTPIFPVKK | IHYMDLILA  | GLTIAPDKIQ  | VHKTLLHGPELLEKLLG---YFYIHSLSALAKTVTRQVTCRQH    | PLRIGSDNGPVLVADL  | HAAYPQSSSGQVERMNRITK  |
| HERV40               | XNSLVXVVK  | FHYIDDXVLL | KLQKSHGTCL  | VHKTLLHGPELLEKLLG---YFYIHSLSALAKTVTRQVTCRQH    | PLRIGSDNGPVLVADL  | HAAYPQSSSGQVERMNRITK  |
| Cypsy                | WSAPVWVVK  | LFYLDLIIIF | NFKLQPSKSE  | VHKTLLHGPELLEKLLG---YFYIHSLSALAKTVTRQVTCRQH    | PLRIGSDNGPVLVADL  | HAAYPQSSSGQVERMNRITK  |
| HERV74               | FNSPILPVKQ | ZHYIDDLILA | EATYSPFTLIL | VHKTLLHGPELLEKLLG---YFYIHSLSALAKTVTRQVTCRQH    | PLRIGSDNGPVLVADL  | HAAYPQSSSGQVERMNRITK  |
| gg01-ChrU-59120725   | FNTPLPVKKS | LQYVDDLLA  | GLRVSKNKKQ  | VHKTLLHGPELLEKLLG---YFYIHSLSALAKTVTRQVTCRQH    | PLRIGSDNGPVLVADL  | HAAYPQSSSGQVERMNRITK  |
| gg01-chr7-7163462    | LNGGRYTEAH | LKVYDHLIS  | GLRVPRNKSQ  | VHKTLLHGPELLEKLLG---YFYIHSLSALAKTVTRQVTCRQH    | PLRIGSDNGPVLVADL  | HAAYPQSSSGQVERMNRITK  |

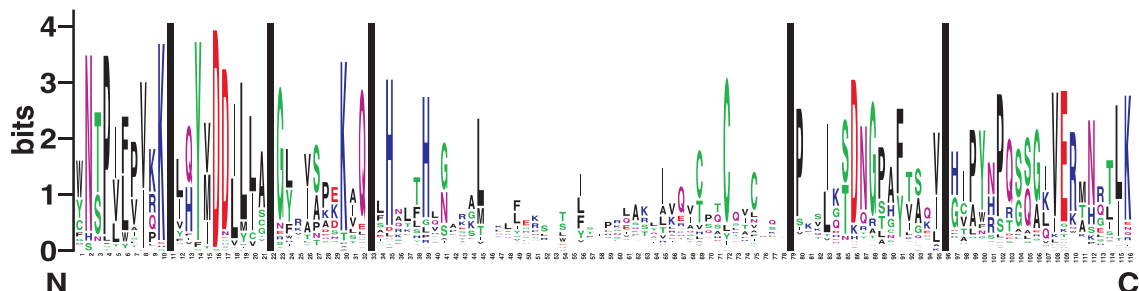

Supplement: 1742-4690-2-50-S5.pdf [file 1742-4690-2-50-S5.pdf]
