# Supplementary material for: Use of Endogenous Retroviral Sequences (ERVs) and structural markers for retroviral phylogenetic inference and taxonomy
Source: PubMed Central journal article supplement (PMC1224870; doi:10.1186/1742-4690-2-50), 2005-08-10

dUTPases  
Minimum Evolution (MEGA3.0)  
bootstraps >50% are shown

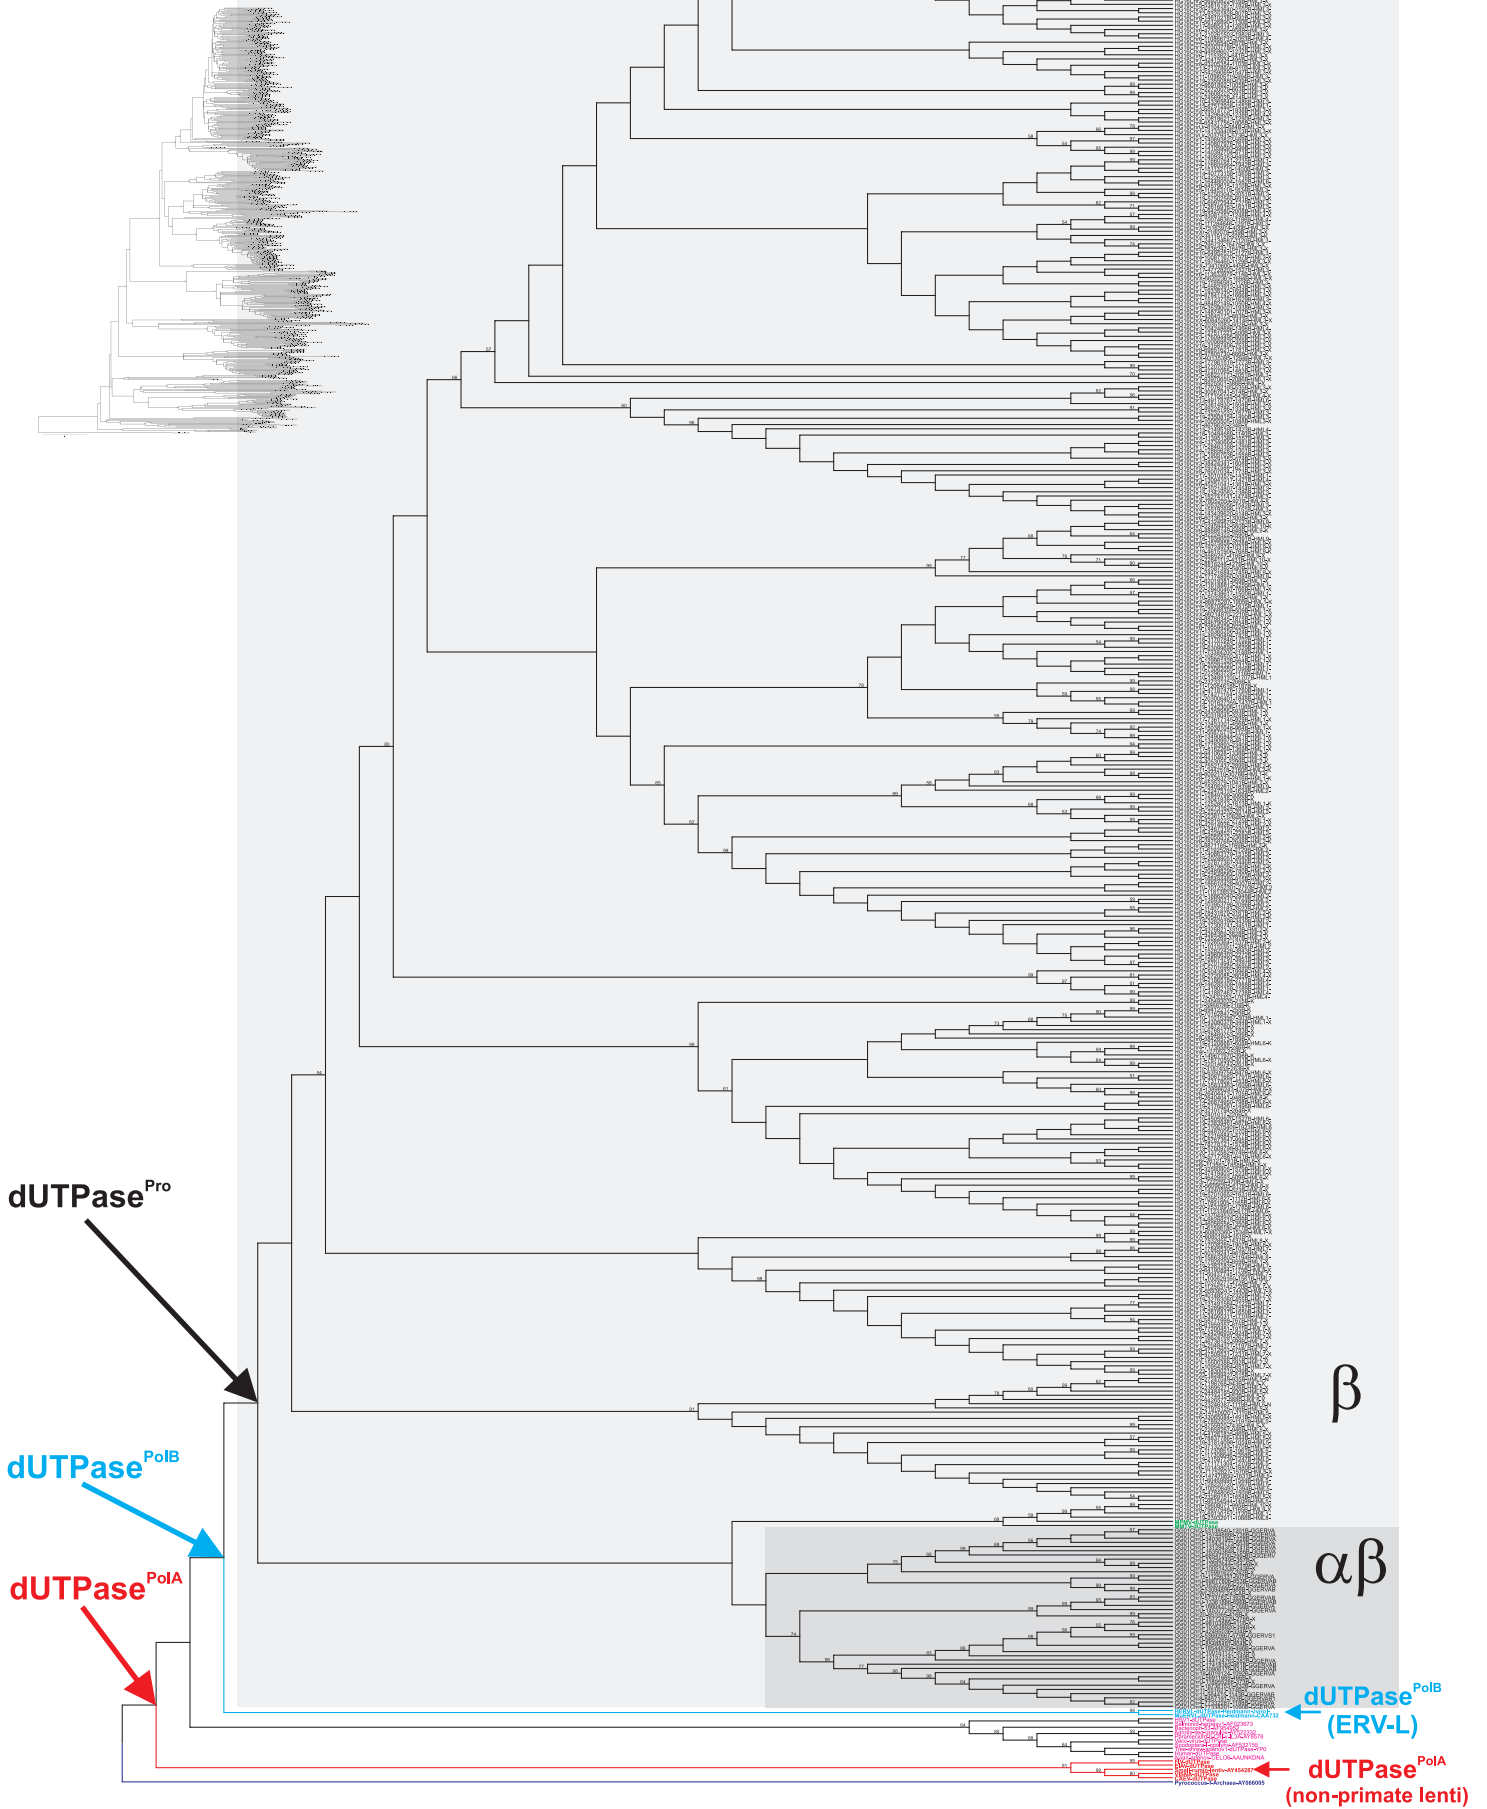

Supplement: 1742-4690-2-50-S3.pdf [file 1742-4690-2-50-S3.pdf]
