# Supplementary material for: Use of Endogenous Retroviral Sequences (ERVs) and structural markers for retroviral phylogenetic inference and taxonomy
Source: PubMed Central journal article supplement (PMC1224870; doi:10.1186/1742-4690-2-50), 2005-08-10

# WebLogo consensus of ERV dUTPase<sup>Pro</sup>

RetroTector motifs are indicated over the consensus  
(Alignment including 385 RetroTector predicted possible dUTPases.)

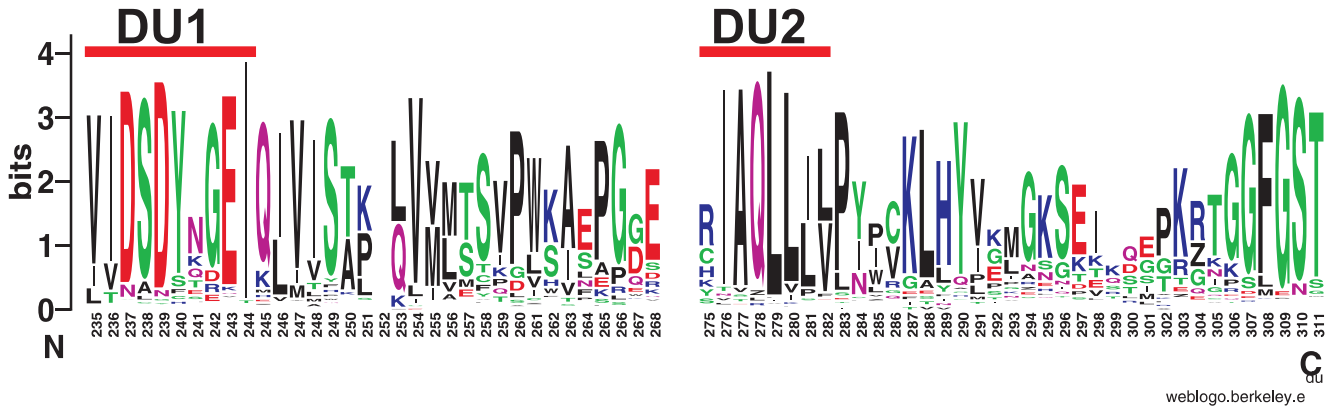

# WebLogo consensus of ERV C-terminal Pro G-patch domain

(alignment including 78 RetroTector predicted possible G-patches)

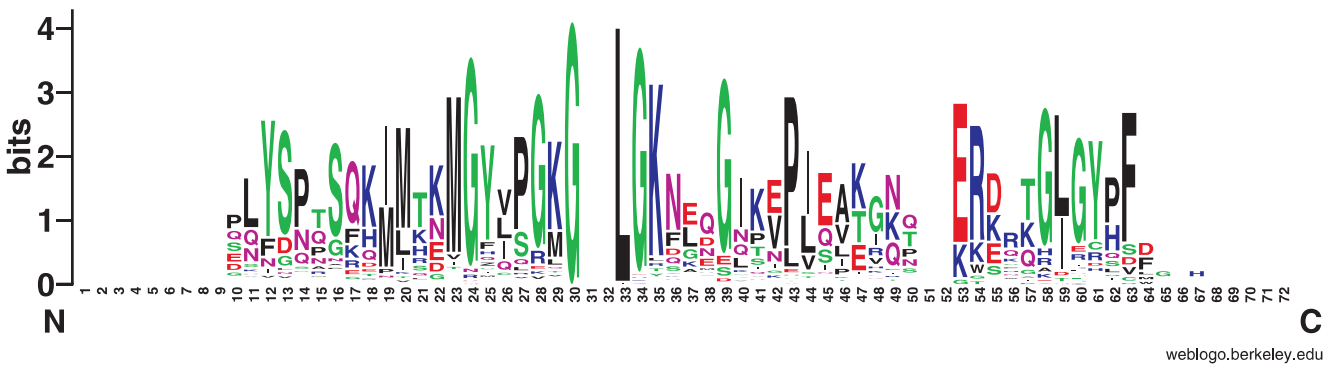

# WebLogo consensus of ERV C-terminal Pol IN GPY/F domain

(alignment including 560 RetroTector predicted possible GPY/F motifs)

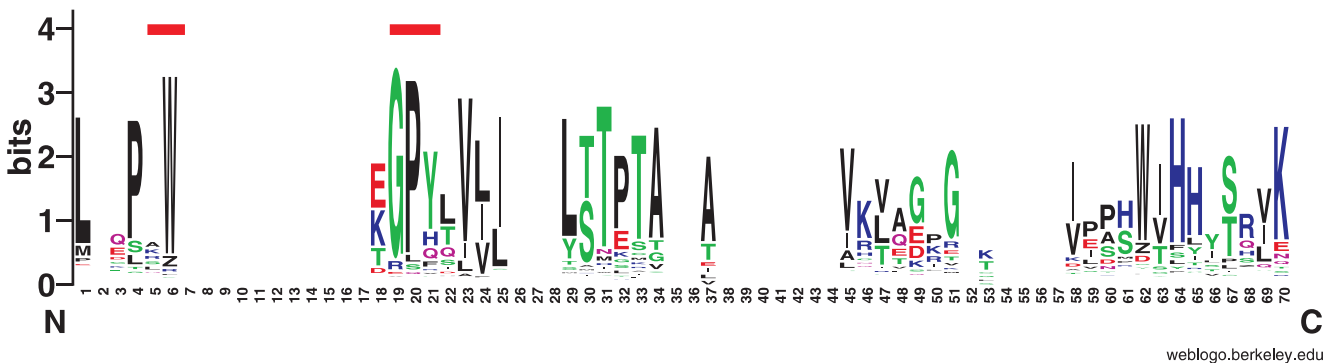

Supplement: 1742-4690-2-50-S4.pdf [file 1742-4690-2-50-S4.pdf]
