# Supplementary material for: Use of Endogenous Retroviral Sequences (ERVs) and structural markers for retroviral phylogenetic inference and taxonomy
Source: PubMed Central journal article supplement (PMC1224870; doi:10.1186/1742-4690-2-50), 2005-08-10
Supplement: 1742-4690-2-50-S6.pdf [file 1742-4690-2-50-S6.pdf]

# Pol FASTA sequences

---

>HERV-S

SGGGHFAWSGLKHHGQRIQTLSSCNKASNAWIYTPPAPVLPQPQRVTSTHQYHLPGGHTE  
ITKTIKLEELQIVSGTHRPHYHFPVWPVRKPDGTWRMTVDYRELNEATPPLHAAVPSIMD  
FMEHLTTELGQYHFVVDLANAFFSNHIAPESEQEFTFTWEGSQWFTTMLPQGYVHSPTIC  
HGFVAMDLAAWNCPKGVSLFHYIDDIMILADLEGAGPLLQQQLAACGWTINESKVQGPGL  
SAKLLGVIWLDKTKAIPeAITDKIQAYPZPTTVRQLQTFVGFGLGYZQALVSHLAQMIKPL  
YQLTKQGATWNWVDEANSLSGHQAGYSLDMSLTSDZSGRPFEDVHVATDGFQWGLWQCI  
EHFRMPVGFPCPTYGRELSYGNLLEKQLAAAYAALQACENLTGWPTVVMQMTYPIAEWVGS  
WVITPQTGRVQSTSLAKWGAYLEQQSTLNTSPLAAELPEVLGHVVLRQGKAMGPEAPLTM  
SHHHLRKGALSFLMDIVYRWVQPSATAAWTAVAVQPTTHTIWFYTGCGSSQWAEALRVVW  
MVIKTESPGNLYQZLGSLLRVNLVVDYLEVIELACGHRPIWGQTMWQDIWEMGHQVSGH  
MPLTTPSNDEANALTKVQWLELAPTZDVALWLRKLRHGGGVNWCNRSVGAELSLPSQD  
ILEACQKCSACTQAYPRYRQLPSVTQQVMVRQMPLETTWQIDYIGPLPKFQGYTHALMAVD  
MATGLLFITYPCRVAQQHTIZTLEHVCALYSHSLAIESDRRTHFTGQQVQQWAEQIDIQZ  
GFHVSYNPQITGMI EQHSILKNGLHLHVTHPSLWGWSSRLDLVFQILNEWPRKGGPAPVE  
ALLHWATAPIQHRYP RMTSSDQVWGMVICCCLPQCPRRQENRKPVDHGPSKHTIADL  
AI IAPCGEDLQCDLHVTPRVFTVWPPQLTIHRGMAREGTLPGDIGTVCVTQLPCDFSMST  
RHKITTESZZDVVPSPREEAIGDCIVIQQKKWARILPEGRDLPLLVVPALPFWPQVDML  
QQHRGLGPHLCZGDQCLQLLS

>gg01-Chr4-48130894

PICLPQPRRITNTKQYRLPGGQQEITKTQVQELERVGII RPAHSPYN SPIWPVRKPDGTWR  
MTVDYRELNKVTPPIHAAVFNIA SLMDTLSREIETYHCVLDLANAFFSIP IAKESQDQFA  
FTWEGRQWTFQVLPQGYVHSPTFCHNLVASDLANWNK PSTVKMFHYIDDLMLTSDSIEAL  
EKVPSLITYLTYLQWAINPQVQGPGLSVKFLGVVWSGKTKVLP SAIIDKMQAFFPVPTK  
PKQLQEFGLGILGYWRSFI PHLAQLLKP LYRLTKKGQVVDWGRTEQEAFQQAIAVKQAQA  
LGI FDP TTPAELDVHVTQEGFGWGLWQRQSSVRIPIGFWSQIWHGAEERYSMVEKQLLAT  
YSALQAVEPITQTAEVIVKTTLP IQGWVKDLTHIPKTGVAQSQTVARWVAYLSQRSRLSS  
SPLKEELQKILGPVTTYSETPEEIVVTCPEKSPVQEGKYPIPEDAWYTDGSSRGNPSKWR  
AVAYHPSTETIWFEEGDGQSSQWAEALRAVVMVITQEPGNSALNICTDSWAVYRGLTLWIA  
QWATQDWTIHARPIWGKDMWVDIWNVVRHRTV RAYHVS GHQPLQSPGNDEADTLARVRWL  
GSTPSEDIAHWLHRKLRHAGQKTMWAAAKAWGLPIQLPDI VQACQDCDACSRMRPRPLPE  
TTAHLARGHNPLQRWQIDYIGPLRSEGARYALTCVDTASGLMQAYPVAKANQAYTIKAL  
TRLMASYGTPEVIESDQGTHTGATVQKWAEDN NIEWRFHLPYNPTGAGLIERYNGILKA  
ALKADSQSLQGWTKRLYETLRDLNERPRDGRPSALKMLQTTWASPLRIQITSKDTS LKPQ  
VGTMNLLLPAPDDLEPGRHKVKWPWKVQAGPKWCGLLAPWGRLLLEVGGSVNPSVIGVWP  
TEVIVDTPVFIARGT

>HERV-L

IVNQKQYRIPGGIAEISATIKDLKDAGVVIPTTSPFN SPIWPVQKTDGSRMTVDYRKLN  
QVVTPIAAA VPDVSLLEQINTSPGTWYAAIDLQAFFSIPVHKAHQKQFAFSWQGOQYTF  
TVLPQGYINSPALCHNFLGETLIAFLPQDITLVHYIDDIMLIGSSEQEVANTLDLLVRHL  
RARGWEINPTKI QGPSTSVKFLGVQWCGACRDI PSKV KDKLLHLAPPNQRGTTSPGIW  
ILEATHSSLGVLRLPIYRVTRKAASF EWGPEQEKALQQVQAAVQAALPLGYPADPMVL  
EVSADRDAVWSLWAPIGESQRRPLGFWSKALPSSADNYS PFERQLLACYWALVETERL  
TMGHQVTRPELPI MNWVLSDPSSHKVGHAQQHSI INSGIYVIGLAGLGT SKLHEEVAQ  
MPMVSTPATLPSLPQLHMASWGFPMILTEEEKTRAWFTDGSARYAGTTRKWTAAALQPLS  
RTSLKD VVKGNLPSGQLRAVHLVVF AWKEKWP DVRLYTD SWAVANVWLDGGTWK KHDWK  
IGDKEIWGRGMWMDLSEWKT VKIFVSHVSAHQRVTS AEEDFNNQVDRMTHSVDTTQPLS  
PATPVIAQWAHEQSGHGRMEVMHGLSNMDPLTKADLAMATAECPICQOETNTEPSIGTI  
PRGISQLWWQVDYIGPLPSWKGQRFVLTGIDTYSYGYFAYPARNASAKTTIRGLTECLIH  
RHGIPH S IASDQGTHTFAKEVWQWAHAHGIHWSYHVP HHPEAAGLIERWNGLLKSQLQCQ  
LGDNTLQGWGKVLQKAVYALNQRPIYGTVSP IARIHGSRNQGV EVEVAPLTIITPSDPLAI  
FASCSRDI TFCWPRGLSSRGRNAPPGDTT IPLNWKLR LPPGHFGLLLPLSQQAKKGVTV  
LAGVIDPLS

>pt01-Chr5-53871501

TPILTSPSDNWLQEFPPQAWAETGGLGLAKFQAPI IVDLKPTAVPVSIRQYPMSZEARMGI  
QQHINKFLELGLVLRPCRSPZNTPLLPVKKPGTQDYRPIQDLREINKRTMDIHPTVNPYN  
LLSSLRPDHNWCTVLDLKD AFFCLPVAPQSQELFAFEWRDPEKGISGQLTWTRLPQGFKN  
SPTLFD EALHRDLTDFHTQHPDLTLLQYVDDLLLAAPTKEACLQGTRHLLQELGDKGYRA

SAKKAQICQTKVTYLGYILSEGKRWLTPGQIETVARIPPPRNPKEVREFLGAAGFCRLWI  
PGFAELAAPLYALTKRSNPFIWLEEHQQAFAEALKKALLSAPALGLPDTSKPFTLFDVDER  
GIAKGVLTQKLGPKRVPVAYLSKKLDPVAARWPPCLRIMAATAMLVKDSAKLTLGQPLTV  
ITPHALEAIVRQPPDHWITNARLTHYQALLLDADRVNFGPPVTLNPNATLLPVPEDPLSPH  
DCRQVLAETHGTREDLQDYELPDADHTWYTDGSSFMADGTRKVGAAVVDGHATIWAQALP  
PGTSAKAEIALTKALELSQGKKANIYTDSDRYAFATAHTRS IYERRGLLT SERKE IKNK  
AE I IALLKALFLPKKVAI IHCPGHQKGHDPVAQGNRQADQAAKQAARVETLTLVSETRKA  
DQMPSPTS YTYTPEDQKEAVALGATENQETKNWEKDGKTVLPQKEAMAMLQOMHAWTHLS  
SKKLRLLI EKTDFLI PRVGTLL EQVTLACKACQQV NAGATRV PARIKAWGNRPRTLLEVD  
FTEVKPHCGGYKYL LVFVDTFSGZVEAFPTRQETAHIVAKKILDRIFPRFGLPKVIGSDN  
GPAFVSQVSQGLARILGINWKLHCAYRPQSSGQVERMNRTIKETLTKLTLETGLKDWRC  
LSLALLRARNMPNRFRLTPYE ILYGGPPPLSTLLDSYSPSDLKTDLQARLKGLQAVQAQI  
WTPLAELYQPGHPQSSHPFQVGDSVYVRRHRSQGLEPRWKGPYI ILLTTP TAVKVDGVAA  
WIHASHVKA APEVSGP ASPERWRLRRSGDPLKIRLSRV

>BaEV

WNTPLL PVKKPGTQDYRPVQDLRE INKRTDIHPTV PNPYNLLSTLKP DYSWYTVL DLKDA  
FFCLPLAPQSQELFAFEWKDPERISGQLTWTRLPQGFKNSPTLFD EALHRDLTDFRTQHP  
EVTLLQYVDDLLLAAPT KACTQGTRHLQELGEKGYRASAKAQICQTKVTYLGYILSEGK  
RWLTPGRIETVARIPPPRNPREVREFLGTAGFCRLWIPGFAELAAPLYALTKESTPFTWQ  
TEHQLAFEALKKALLSAPALGLPDTSKFTLFLDERQGIKGVLTQKLGPKRVPVAYLSKKL  
DPAAGWPPCLRIMAATAMLVKDSAKLTLGQPLTVITPHTEAIVRQPPDRWITNARLTHYQ  
ALLLDTDRVQFGPPVTLNPNATLPVPENQPSPHCRQVLAETHGTREDLKDQELPDADHTWY  
TDGSSYLDGTRRAGAAVVDGHNTIWAQSLPPGTSQAQKAEIALTKALELSKGGKANIYT  
DSYAFATAHTHGSIYERRGLLTSEGKEINKAE I IALLKALFLPQEVAI IHCPGHQKQDP  
VAVNRQADRVARQAAMA EVLTLATEPDNTSHI I EHTYTS EDQEEARAIGATENK DTRNWE  
KEGKIVLPQKEALAMI QOMHAWTHLGNRKLKLLI EKTDFLI PRASTLIEQVTSACKVCQQ  
VNAGATRV PAGRGNRGNRPGVWEIDFTEVKPHYAGYKYL LVFDTFSGWVEAFPTRQETA  
HIVAKKILEE I FPRFGLPKVIGSDNGPAFVSQVSQGLARILGINWKLHCAYRPQSSGQVER  
MNRTIKETLTKLTLETGLKDWRRLLSLALLRARNTRNFGLTPYE ILYGGPPPLSTLLNSF  
SPSNSKTDLQARLKGLQVQAQI WAPLAELYPGHRTSHPFQVGDSVYVRRHRSQGLEPRW  
KGPYIVLLTTP TAIKVDGIATWIHASHAKAAPGTGPTSSGTWRLRRSEDPLKIRLSRT

>MLV

AQMGPMGQPLQVLT LNI EDEHRLHETSKEPDVSLGSTWLSDFPQAWAETGGGLAVRQAPL  
I I PLKATSTPVS I KQY PMSQEARLG I KPIQRLLDQGILVPCQSPWNTPLL PVKKPGTNDY  
RPVQDLREV NKRVDI HPTV PNPYNLLSGLPPSHQWYTVL DLKDAFFCLRLHPTSQPLFAF  
EWRDP EMISGQLTWTRLPQGFKNSPTLFD EALHRDLADFR I QHPDL ILLQYVDDLLLAAT  
SELDCQQGTRALQTLGNLGYRASAKAQICQKQVKYLYLLKEGQRWLTEARKETVMGQPT  
PKTPRQLREFLGTAGFCRLWIPGFAEMAAPLYPLTKTGTLFNWGPDQKAYQEIKQALLT  
APALGLPDLTKFELFVDEKQGYAKGVLTQKLGWRRPVAYLSKKLDPAAGWPPCLRMVAAI  
AVLTKDAGKLTMGQPLVILAPHA EALVKQPPDRWLSNARMTHYQALLLDTDRVQFGPVVA  
LNPATLPLPEEGLQHCLDILAEAHGTRPDLTDQPLPDADHTWYTDGSSLLQEGQRKAGAA  
VTTEVEVIWAKALPAGTSAQRAELIALTQALKMAEGKKNVYTD SYAFATAH I HGEIYRR  
RGLLTSEGKEINKDE I LALLKALFLPKRLS I IHCPGHQKGHSAEARNRMADQAARKAAIT  
ETPDTSTLLIENS SPYSEHFHYTVTDIKDLTKLGA IYDKTKKYVWYQGKPVMPDQFTFEL  
LDLHLQ LTHLSFSKMKALLERSHSPYMLNRDRTLKNITETCKACAQVNASKSAVKQGTR  
VRGHRPGTHWEIDFTEIKPGLYGYKYL LVFDTFSGWIEAFP TTKKETAKVVTKKLLLEE I FP  
RFGMPQVLGTDNGPAFVSKVSQTVADLLGDWKLHCAYRPQSSGQVERMNRTIKETLTKLT  
LATGSRDWL LLLPLALYRARNTPHGLTPYE ILYGAPPPLVNF PDPDMTRVTNSPSLQAH  
LQALYVQHEVWRPLAAAYQEQLDRPVVPHPYRVGDTVWVRRHQTKNLEPRWKGPYTVLLT  
TPTALKVDGIAAWIHAHVKAADPGG PSSRLTWRVQRSQNPLKIRLTRE

>FLV

TLQLEEEYRLFEP ESTQKQEMDIWLKNFPQAWAETGGMGTAHCQAPVLIQLKATATPISI  
RQY PMPHEAYQGIKPHIRRLDQGILKPCQSPWNTPLL PVKKPGTEDYRPVQDLREV NKR  
VEDI HPTV PNPYNLLSTLPPSHPWYTVL DLKDAFFCLRLHSESQ LLLFAFEWRDPEIGLSG  
QLTWTRLPQGFKNSPTLFD EALHSDLADFRVRYPALVLLQYVDDLLLAATRTECLEGK  
ALLETLGNKGYRASAKKAI CLQEVTYLYGSLKDGQRWLTKARKEAILSIPVPKNSRQVR  
EFLGTAGYCR LWIPGFAELAAPLYPLTRPGTLFQWGTEQQLAFEDIKALLSSPALGLPD  
ITKPFELFIDENSGFAKGVLVQKLGPKRVPVAYLSKKLDTVASGWPPCLRMVAAI A I LVK  
DAGKLT LGQPLTILT SHPVEALVRQPPNKNWLSNARMTHYQAMLLDAERVHFGPTVSLNPA  
TLLPLPSGGNHHDCLQILAETHGTRPDLTDQPLPDADLTWYTDGSSFIRNGEREAGAAVT  
TESEVIWAAPLPPGTSQAQRAELIALTQALKMAEGKKNLVYTDSDRYAFATTHVHGEIYRRR

GLLTSEGEIKNKNEILALLEALFLPKRLSIIHCPGHQKGDSPQAKGNRLADDTAKKAAT  
ETHSSLTVLPTELI EGPKRPPWEYDDSDLDLVQKLEAHYEPKRGTWYERGKTIMPEKYAK  
ELISHLHKLTHLSARKMKTLLEREETGFYLPNRDLHLRQVTESCRACAQINAGKIKFGPD  
VRARRRPGTHWEVDFTEIKPGMYGYKYL VFDTFSGWAEAYPAKHETAKVVAKKLEE  
IFPRYGIPOVLGSDNGPAFISQVSQSVATLLGINWKLHCAYRPQSSGQVERMNRSIKETL  
TKLTLETGSKDWVLLLPLVLYRVRNTPGPHGLTPFEILYGAPPPMAHFFDTDISSFATSP  
TMQAHLRALQLVQEEIQRPLAAAYREKLETPVVPHPFKPGDSVWVRRHQTKNLEPRWKG  
HIVLLTTP TALKVDGVAAWIHASHVKAAGPTTNQDLSDSPSSDDPSRWKVQRTQNPLKIR  
LSRGT

>GaLV

GIRPIQKFLDLGVLVPCRSPWNTPLL PVKKPGTNDYRPVQDLREINKRVDIHPTVNPYN  
LLSSLPPSYTWYSVLDLKDFAFFCLRLHPNSQPLFAFEWKDPEKNTGQLTWTRLPQGFKNS  
PTLFDEALHRDLAPFRALNPQVLLQYVDDLLVAAPTYEDCKKGTQKLQELSKLGYRVSA  
KAQLCQREVTYLGYLLKEGKRWLTPARKATVMKIPVPTTPRQVREFLGTAGFCRLWIPGF  
ASLAAPLYPLTKESIPFIWTEEHQAFDHIKALLSAPALALPDLTKFTLYIDERAGVAR  
GVLTLQGPWRRPVAYLSKKLDPASGWPTCLKAVAAVALLLKDADKLTGQNVTVIASHSE  
SIVRQPPDRWMTNARMTHYQSLLLNERVSFAPPVLPATLPVESEATPVHCSEILAEET  
GTRRDLEDQPLPGVPTWYTDGSSFITTEGKRAGAPIVDGKRTVWASSLPEGTSAQKAELV  
ALTQALRLAEGKNINIYTD SYAFATAHIHGAIYKQRGLLTSAGKDINKEEILALLEAIHL  
PRRVAI IHCPGHQSGSNPVATNRRADEAAKQAALSTRVLGTTKQEP IEPAQEKTRPRE  
LTPDRGKEFIKRLHQLTHLGPEKLLQLVNRTSLLIPNLQSAVREVTSSQCQACAMTNAVTT  
YRETGKRQRGDRPGVYWEVDFTEIKPGRYGNKYLLVFDTFSGWVEAFPTKTETALIVCKK  
ILEEILPRFGIPKVLGSDNGPAFVAQVSQGLATQLGNWKLHCAYRPQSSGQVERMNRTIK  
ETLTKLALETGGKDWVTLPLALLRARNTGRFGLTPYEILYGGPPP ILESGETLGPDDRF  
LPVLFTHLKALEVRTQIWDQIKEVYKPGTVTIPHPFQVGDQVLVRRHRPSSLEPRWKG  
PYLVLLTTP TAVKVDGIAAWVHASHLKPAPPSPDESWELEKTDHPLKLRIRRRRDESA

>PERV

GRRGSDPLPEPRVTLKVEGQPVFVLDTGAKHSVLLQPLGKLDKKSWMGATGQQQYPW  
TTRRTVDLGVGRVTHSFLVIPECPAPLLGRDLLTKMGAQISFEQ GKPEVSANNKPI TVLT  
LQLDDEYRLYSPLVKPDQNIQFWLEQFPQAWAETAGMGLAKQVPPQVIQLKASAAPVSVR  
QYPLSKEAREGIRPHVQRLIQQGILVPVQSPWNTPLL PVRKPGTNDYRPVQDLREVNRV  
QDIHPTVNPYNLLCALPPQRSWYTVLDLKDFAFFCLRLHPTSQPLFAFEWRDPGAGRTGQ  
LTWTRLPQGFKNSPTIFDEALHRDLANFRIQHPQVTLQYVDDLLLAGATKQDCLEGTKA  
LLELSDLGYRASAKKAQICREVTYLGYSLRGGQRWLTEARKRTVVQIPAPTTAKQVRE  
FLGTAGFCRLWIPGFATLAAPLYPLTKKEGFEFSWAPEHQKAFDAIKKALLSAPALALPDV  
TKPFTLYVDERKGVARGVLTQTLGPWRRPVAYLSKKLDPVAGWPICLKAI AAVAILVKD  
ADKLTGQNI TVIAPHALENIVRQPPDRWMTNARMTHYQSLLLTERVTFAPPAALNPATL  
LPEETDEPVTHDCHQLLIEETGVRKDLTDIPLTGEMLTWFTDGSSYMVEGKRMAGAAVVD  
GTRTIWASSLPEGTSAQKAELMALTQALRLAEGKSINIYTD SRYAFATAHVHGAIKYKRG  
LLTSAGREIKNKEEILSLLLEALHLPKRLAI IHCPGHQKAKDPI SRGNQMDRVAKQAAQG  
VNLLPMIETPKAPEPGRQYTLLEDWQEIKKIDQFSETPEGTCTYSDGKEILPHKEGLEYYQ  
QIHRLTHLGTHLQQLVRTSPYHVLRPLGVADSVVKHCVPQVLNANPSRI PPGKRLRGS  
HPGAHWEVDFTEVYKPAKYGNKYLLVFDTFSGWVEAYPTKKTSTVVAKKILEEIPRFG  
IPKVI GSDNGPAFVAQVSQGLAKILGIDWKLHCAYRPQSSGQVERMNRTIKETLTKLTTE  
TGINDWMALLPFVLFVRNTPGQFGLTPYELLYGGPPPLAEIAFAHSADVLLSQPLFSRL  
KALEWVRQRAWKQLREAYSGDLQVPHRFQVGD SVYVRRHRAGNLETRWKG PYPYLVLLTTP  
TAVKVEGIPTWIHASHVKAAPPD SGWKA EKTENPLKLRHRVVPYSVNNSSSZWZTPCG  
QPELPZTLISHLVTYZLRYRYZYQHSRGGSLGDLVAZIIICLPSISNPWSQZPGHTPRCT  
PCLRVLRPRTPKZZRILWKS S GFLQAMELHNFZZWELEMASLSARQSKLLFCZQSYQL  
ZSIZLWPWEMERLATAGTKRCKZANKLSFVRPRLKKNKFHZKTRKYSKVGKWI LGN  
SVLWRLWEKERICSDYSPQNRNSDGTSGCYRTKZGFRTRTSNPRTEAISZPLZLQYNLW  
ISPHAZHHYZNRGETFZPHPGFS SSSZLHDSRGLFLLALLSFGPTLLZGNGZRREIQ  
DKGTZRPMYMGIPKZAYPYZGFWRHLHRDGSPI PPTPLZPHZSLZSNLZESISGTWLZQ  
VVGMYWINPLCFHLGFQPNZRLRYGPNCPGVLLSRKSSPZZIZLZIZS AKKRAHIPD  
TSCNARIGSGCRRGNRNGCPNHR TATAGERTZZPTSNCNGRSPSPRKICQZPGGIPNLLI  
ZSGSTEQKGVRSVISKRRVMCSLKRGM LLLCGSFRSYQ

>pt01-Chr10r-17119458

GPVVTNPHNRTMSILTINLEDEYRLHQEKAAPDQDIATWLQOYPEAWAEMGGLGLAKHRP  
ALFIELKPGTDPMRVRQMPLEAKRGIAPHIRLLDQGVLRPCHSPWNTPLL PVRKPN  
SYRYPVQDLREINKRVDIHPTVNPY TLLSTLNPKHQWYTVLDLKDFAFFSLPLAPQS  
QKLFAFEWNDPDRGISGQLTWTRLPQGFKNSPTLFDEALHEDLGEYRRKHPEIILLQYV  
D L L

IAAETQEACIQGTKGLLQALGNLGYRASAKKAQICKTEVIYLYGILLKGGQRWLTDRKQN  
VLQIPRQSTQVREFLGSAGFCZLWIPGFAELAKPLYQATRQPPFNWTDDEAELAFQOI  
KTALLSAPALGLPDVTKPFHLYVDENKGVAKAVITQNLGPWRRPVAYLSKKLDPVAAGWP  
LCLZMIAAMALMVRDADKLVMGQELRVVTPHAIIEGVKQPPNRWMSNARLTHYQGLLLNP  
LKIIFLPPTTLNPNASLLPNPDLADPLHDCTEILAQVHGVREDLQDRPFPDADLVWFTDGS  
SFMHQGQRYAGAAVTSETEVIWAEPLPPGTSQAQKAELIALTQALTLGAGKCLTVYTDSDRY  
AFATAHIHGAIYRERGLLTAEGKEIKNKQEIILALLTALWRPEKLAIVHCPGHQKLTTPTA  
QGNFLADQTARNVAKAPSQLLALQLPDLGPRDLPYFPEYSEQDLQWIDKLPKQIQNGWW  
TDTNDQTILPEKLGQQVLEHHRTHLGGARRMIDLIRRSKLRIRHIDETASSIVTSCVKC  
QLNNATPKSQAAAGTRLRGHRKENTAVARGNPKAVSAAREVALSSAPSINLLPAVSFPQP  
RETAQVVAKKILEDILPRYGFPIQIGSDNGPAFVAKVSQDLASILGANWKLHCAYRPQSS  
GQVERMNRTLKEALTKLTIEGTANWVLLPIALFRAHNTPYKLGLTPYEIMYGRPPPLVP  
SLKDDLLKSETENVSEFLFSLQALQKIHQEIWPKLRELYETSPPTPHPYQPGDWLVKR  
HRQETLEPRWKGPLQVLLTPTALKVEGIASWIHYTHVKPVDPTSDLLGPITAAAAEAPD  
TWTVDRAKNNPLKLTTLHRQHNSLQTC

>HERV-T

NTLLLDLQTLFPRVSAESNPPGLAKHHPVVIPELLATAIPVQAKQYPTSQQAREGINPHI  
QRLQAGILTQCSAWNTPFPLPVQKPGTNDYWPVQDLRDNVKNWTVAVHPTIPNPYTLTSL  
LPPEHTVYTVLDLKDFAFFAIPLAPKIQPIFAFKWTDPRSGDTTQLTWTQLPQGFKNSTPL  
FGEALQQDLTFRASHLNCTLLQYVDDILITTEMDGCLQHTRDLLYLLQELGYGVSAKKA  
QLCLPRVSYLGYKINKGKRALTSARKEAILRIPTPATKRQVHEFLGALGYCRLWISGFAE  
ITKPLYTATKNGNPLIWTDTTEEQAFQNLKALTAQAALALPNISKPFHLFVHESQGVAKR  
VLTQTLGTWRGPVAYLSKKVDPVAGWPSCLAAIVATASLVQETDKLTLGQNLTLTVPHA  
VETZLRSASGKWSNARILQYQSLLLDQPCLTFSPTRCLNPATLLPDPDSNTPVHDCQEL  
LEATETGRPDLQDVLLRKADATVFTDGSFLEQGIKAGAAVTTETDVLWVQALPASTSA  
QKAEIALTQALRVVHKRINIYTDSDRYAFATVHVHGAIYZERGLLRSEGIKIKNKEEIL  
ALLEAVWLPQAVVHCKGRQKENTAVARGNPKAVSAAREVALSSAPSINLLPAVSFPQP  
DLPDNPAYSTEEKLAANLRANKNQKGWILPDSRIFVPPALGETLVSHLHSTTHLGTKL  
AQLLRSCFKIIPHLQSLTDQAVLWCTACAQVNAKQGPSPGHRLRRNSPGEKWEIDFTEV  
KPHRAVYKYLVSVDTFSGWTEAFATKNETANTVVKFLLNEIIPWYGLPAAIGSDNGPAF  
TSSIAQSVSKALNIQWKLHCAYQPQSSGQVECMNHTLKNLTKLILDTSENWVKLLPLAL  
LRVRCPTYQAGFSPFEIYGRAPPILPKLKAHFAEISQANLLQYLQSLQVQEIILPLV  
ZEAHSPVPDQMGPCHSFQLSDLVFVKKFQREGLTPAWKGPHTVILTTPTALKVDGIPAW  
IHSHIKKANKAQTTETWVPKPGSGPLKHLHLSRVKLLN

>ERV-3

APMQPCTQEEELFRPIDKIPGVWAEDKPPGLAVNQALVVELKPGATPVQVCQYPLSQE  
DIWGIYKHLKWLCDHGI IQCQSPWNTPLLLVQKPLPGPSDEYIPVQGLHAVNQATVTI  
HPVVPNLYTLMGLILASATWFTVLDLKDFAFFCLYLAPVSPPIFAFZWDNSVTGTGGQLAW  
TSLPQGFKNSTIFGEALASDLKAYTPPNDNCALLQYIDNLLAAPTQEDCYWGTQDLLH  
LLWKAGYRVSKKAQICHEKVKYLGFIVSQGERWLGHGZKQAICALPTPTTWRQIGEFLLG  
AAGFCHIWIWPNFSLIARPLYEATREGEKEPLLZKADQKKVFKQIKEALTQAPALGLPDTT  
KPFFLYVHELKGMAGVLTQIIGSWHRPVVYLSKQLTVVLGWPPCCKALATTTLLTQEAD  
KLTGLQTLTIQVPHAVITLMDQREQHWLSNPTMTZYQGLLNCENPRITLETVNTLNPATLL  
PVKPGITFRDCGNVDEFAALTRVLQLAEDKKISVYTDSDRYAFATLHVHGAIYKERGLLT  
ATGKEIKWKEZILQLLDAVWIPEKVAAMHCRGHQRAGTSEAKGNRKADREAKWAAMVTPH  
FKKEALAMPLLPEPPLQEVSSYSPNEKAVLPKLENILKEDGGNFDGRSAIPKMPVAPKVV  
KZLHHELVGKTALETLLGRHFYVPRLTAITQAVCEQYLTCANNPZQWPTRPPGIQEIQT  
MPCENLLMDTELPQAGSYRYMLVLVYTFSGWAKAFPTRSKNSZEVTKILLRNIIPRFGLS  
VTLGSDNRLAFLAEIIQELTRVLKIKWKLH

>HERV-E

SKLRATISFTEHGSLLLKLPGTGVIMTLMPLPREEEWRLFLETPGQEIROPALAKRWPRVWA  
EANPPGLAVNQAPVLIIEVKPGVQVPRQKQYVPLREALEGIQVHLKCLRTFRIIVPCQSPW  
NTPLLPVPKPGTKDYRPVQDLRLVNQATVTLHPTVPNLYTLLGLLPAEDSWFTCLDLKDA  
FFSIRLAPERQKLFQWEDPESGVTQYTTWTQLPQRFKNSTIFGEALARDLQKFPTRD  
LGCVLLQYVDDLLLGHPTAVGWPREQMLYSGTWRTVGIKPRKKAQICRQVQCYLGFITIQ  
QGEHSLGSEKQVICNLPEPKTRRQVREFLGAAGVFCRLWIPNFAVLAKPLYEVTKAGDQE  
PFEWGSQQQAFHELKERLMSVPALGLPDLTKPFTLYVSESEKMAVGVLTQTVGPWPRPV  
TYLSKQLDGVSKGWPPCLRALAATALLVQEADKILGQNLNIKDPHAVVTLMNTRGHHWL  
TNARLTKYQSLLENPHITIEVCNTLNPATLLPVLEIPVEHDCVEVLDSVYSGHQGTGNYT  
WMGAALSTHKKRDVQGMRWLWTLKLPDRFPRALQRLKLNLSLFGPNSVKVRLTFTLTL

MSFPFKCMEHYVKKRAYTLGEKTNINKKSCNYKQYGNPTRWLLYIAEDTSELPPWVWGI  
PALTRLKKQHLPRFRASVTAPLLPQAPDLVPTYSKEEKDFLQAEGGQVMEEGWIWLPDGRV  
AVPQLLGAAVVLAVHKTTTHLQGESLEKLLGWYFYI SHLSALAKTVTQRCVTCRQHNARQG  
PAVPPGIQAYGAAPFEDLQVDFTEMPKCGGNKYLLVLVCTYSGQVEAYPTRTEKAHEVTR  
VLLRDLIPRFGPLRIGSDNGLVVFADLVQKTAKVLGITWKLHAAAYQPQSSGKVERMNRT  
IKNSLGKVCQETGLKWIQALPMVLFKIRCTPSKRTGYSPEILYHRPPPILRGLPGTPRE  
LGEIELQRLQASGITQTI SAWVNERCPVNLFSVPVHPFSPGDLVWIKDNVACLCPRWKGP  
QTVILSTPTAVKVEGIPTIHHSRVKPAVPETWEARPSPENPCRVTPKKTTSPAPVTPGSL  
VHARPKHAEAHGIIHFSILDLYSKGFN

>gg01-ChrU-126703652

PLRAEDREGMQPVIDRFINHGLLVECESKYSITILPVRKPDGSYVWVZNLRAINKIVEDL  
YPLVANPYTLLTKLSTELMYFTVLDLKDFAFLPLAAESQLLFAFEWENPSTGRKSQLTWT  
VLPQGFKNSTIFGNQLAKDLEQWERPSNEGVLLQYVDNLLIATKTKEDCLKWTISLLNF  
LGLNGYRVSPQZAQVAQQQVTYLGZEIAAGMRTLGTAKQEGICQTPERTSRELRTFLGM  
MGWCHLWIPNYELLVKPLYVLLKSCPKDLIWDGETTRAFQQLKQELMKAPALGLPDVTKP  
FLLFSYEKQGIAGLVLAQNVEPYQRAVAYFSKQLDEVSKGWPGCLRAVAALVUNIQAQW  
FTMGQKITMLVSHVSTVLEVKGLKYZAVLVEQDDVEIMITNI INPASFLSGVTGEPIS  
HDCLETIEAVYSCIDLKEDPLEGDEDTWYTDRSSFVZQGI CKAGYAVFTLMRZLEAKAL  
PPSRGHRRLRYSLNKGLEXXXXXXXXXXXXXXXXXXXXXXXXXXXXXXXXXXXXXXXXXAAE  
MDNALADREAKQAAEGKVVEGSLIPDGKIQVDGEPYRYSKEDWNLISDLEGQVKEEGWAIT  
PQGLIIPTAILWAVVMAEHRKTHWGTEALYKYLZQVAZNLSTTTTRQVTQCEVCLQN  
NPKTGHRVQLGQIGKGNYPGQQWQIHFSELPRKGGYRYMLVLTDTFSGWPETYPQRTNKA  
REVTKILLQEVIPRFGVLGVISSDRCLHFVAKIVQQVSTLLGIDWQLHTPYRQPLSGQVE  
KMNHZLKLQTVKIGQEVGIPWPQALPLALLRIRTKPZTKEKLSPEIILYGPZYAVQKGIS  
MPVGDQVLESEYVISLEATQKLLKTI FGTRAQGLDGLVHDILPGNYVYVKSLSDSPLZPRW  
EGPYQVLLTHTTAQVEGLIPWIHHTRLKKIMRPQWTAERPLRVVICKNV

>HERV-ADP

NPLVWLRREGNRGGLTITPLQIELKQAEVVCVKQYPI SLEGRKCLQPVIEELIKDGLLEP  
CMSPYNTPILPVKSPGLYRLVQDLRTINQIIQTRHPVMPNPYTFLRKIPYEHKWFRVVDL  
KDVFWACPLDFRSRDLFAFEWENPITGRKQZYCWTVLPQGFQVQILENVLEESQTSRGT  
QLLQYVDYLLISGEKRARVSETTTNLLNFLGERGLZVSKNKMQFVEKEVKYLGHLINEGK  
WRINPERLLEIMGLPLPKTKRELZNFGLTHYRRLWMSYAQKTKILYLKLEEEPPLZW  
SPEEQAVKELKQALITAPVLAFFPLEKPFHLFVTVDQGVALLTQTLGGKRQPVAFVS  
KLLDSVSCRWPKCMKAVAATALLVEESQKLTFFGALIVSTPHQVRNINLZKARTWLMDSQ  
ILKYEAILVEZDDLVIITDCLNLASFLZKGEENKETS DHNCLNIEYQTKVRPDFREAPL  
HVVLVFDGSSZVIDGRRHSRYTVIDENKHSLECKGRLPNGWLAQTCELHALNQAALNLED  
QEGTIYTD SKYAHGVLHTFGKIWTEQGLINSRZKELVHGELVKQVLESLLLPAEVAIVHV  
NDHQIGNTVEAIGNRLADEAAKQASLEEEIRLFSLIPDISKVVLRPQFTKEEKEELDKIG  
VTQTEDGKWWLPAGREMIKPLMRELM SILHKGSHWGPQALCDAILRNYVCIGIZTLTKQV  
CGSCVICQSLNKM LARKQAMGRRPPLRFLQSIQVDFREMPKIVRLKYLIVDHLSGWM  
EGFPLPTATTRNVKIIIEZIVPRFGLAENIDSDNGSHFTSRVLRGIMEGLQIRWDYRTPW  
HPPSSGKVERMNQTFKKHITKLIETKMPCTTCLQIALLSIRTAPRKDGIAPYKLLYGLP  
YLGRATDLPMTETKQFLRNYLLAISSTLSSLRLKGLLIQVPLEFMVTFQLGDLVLVKTW  
KEDKLHPSRDGPYQVLLTTEAMRTAEWGWTHYTGQMTGKRDRPRERERPVKSARVTQEP  
LKLTQKNLKRKYGLASSGS

>gg01-chrU-49656081

PVWVWKEGNRGLRITPLKIKLQEKYEIIRQRQYPIPFEGRMGLKPVIQGLLKDGLLEPC  
MSPFNTPILPVRKPDGSYRLVQDLRINEIVQKRHPAVPNPYTLMKIPNENRWFVIDL  
KDAFWSIPLDHESRDIFAFEWEDPESGRKQYRWTVLPQGFTESPFVLLLQYVDDLLLSG  
PEKVEVKRATNELLNFLGKQGLRVSKNKLQYVEREVGYLGHLVSEGKRITPERIQGIE  
LPLPRTQRELKFLGVGCCRLWIESYAQKTKRLYLKLLDGEPNILEWTAEEKQLIEELK  
QSLITVPVLAALPALNPKPFQLFVTVDQGAALGVLTQEWGDKRQPVAYLSKLLDPVSQGWPO  
CIQAVAATALLAEESRKITFGRRLLVVTAPHQVKTILTQKAGRCLTTCLNPATFLWKGEEK  
EENIEHNCLDLIECQTKVRPGLQDTPLGEGKLLFIDGFSRVVHGKRYNGYAVVEGAEGE  
REMGQLPNNSAQTCELYALNRVLHLLKGEEGTIFTDSRYAYGVVHTFGKIWEERGLINS  
KGKELVHEALIRQILENLLLPTIEAVVHVKGHGKGNISITAQGNRIADKTAREAALQSZII  
MNYLVPEVPPPPPKQIFSEKEKDTFRDLGAI SEGKWILPDGSELLNKAVTREILTILHQ  
GSHWGVQAMCDAVLRKYVSAGIYTLAKQVCRECAVCQRVNNKVI RSRPTGGREPGIRPFQ  
SIQVDFTELPKVGRVKYLLVLVDHLTGWVEAFPSVFATANTVTKVILEQIIPRYGVVEHI  
DSHQGSHFTSQVLWKL MHTLEIKWEFHTPWHPSSSGKVERMNQTIKRHLTKLVLETRLPW  
TKCLPLALLZIRTAPRKDVGVSPYEMFLGFLPYLGKKNEIPQFETKDAFLKLYTRVILLI

SSQNPRITISINPPLEFPVHPFQAGDWVLTQMWKETKLQPDWEGPFQVLLTTTETAVRTAEK  
GWTHYTRVKASTSPDAWEAVGTEEPLKIRIRKRKL

>HERV-I

PQVSPKGFSLTSLNLLTTADEKYIHPDVVSREENZGKLRILPIHIKLNTPHWEVVRKQFP  
IPLEGMLGLKPIIESLINDGELLEPCMSPYNTPIIPVKKSDGSYRLVKDLRAINQTVQTTN  
PVVNPYITLSKIPYNHQWFTVIDLKDAFWACPWLESRDTFEFWEDPQLGZKQWYQWTV  
LPQGFMDSPNLFQIILEQVLDKVSVPKQLCLLQYVDDILISGEDIKEAGFSTHIFDHLQ  
FEGLRVSKGKLQCMPEKVKYLGRLLISAGKRRIGPEWVEGIVSLPLPQTKQELRKFLGLVG  
YCRRLINSHALNSKLLYQKLAQGGKPEHLLWTSKEVDQVKELKGIITALALALPSLENTL  
HLFVSVKNGVALGVLIQEHRGCVQPMFLSKILDVLTGWPQCIQSIATAVAVLVEESRKL  
TFGWRLTVSTPHQVRAILNKKAGRZLTDNRILKYGAILLKKDEEHLCLDLIDYQTKLRPD  
LGKIPFKTGRHLFIDGSSQLIEGKRHNGYPVIDGESLCIRTESRKLPPNNWSAQTCELFA  
SQALKHLQNEGTIYTDISKYAFGVAHTFGKSWTECGLTNSKGDHLDVHKELIIQVLDNLQ  
PEEIAIVRVPGHQKSLSFESRGNLNTQIAKQAAVSSETPMFHLTPCLPSPTAISFFSSI  
EKEEZRPZEPKEKTRMKTAVTRPKGNVIQARYVEDLVSTYLRTHWGSQAMCDAVLRVYGC  
RIYTLAQVTDSCICKKTSKQILRKPLGKFRAKTISKCSINYTEMPPIGHLKYLVI  
IDHFTYVWETIPHSNATTSNVKALINENIVPRFGLIQSTSDNGTHFTAYVIKLAQVLD  
IKWKNHIPWHLSSRRVERMNQTLKSHLTKLVLETZLPWTKCLPIALLRIRTAPQRDTGL  
SPYEMLYGLPYLYSTANIPTFKIKDQFLKNIILGPYSTFSSKTKGLLAQAPPLEFPAHZ  
RQPGDHVLIKGWKEGKLPWAGPYLVLLNTKTAVRTANEDGLITPASKRRCHLQDHKPS  
LQGSPPQN

>HERV-Hconsensus

PQVWDISTPSLATDHPITIPKPNHPYPAQCQYPIQHALKGLKPVITRLLQHGLLKP  
NSPYNSPILPVQKPKDSYRLVQDLRLINQIVLP IHPVVPNPYTLSSIPSTTHYSVLDL  
KHAFFTIPHPSSQPLFAFTWTDPDTHQAQQITWAVLPQGFDTSPHYFSQALSHDLSFH  
PSASHLIQYIDDLKCSFESSQDITLLQLCLFSKGYRVSPSKAQISSSVTYLGIIL  
HNKTRALPADRLLISQTPPTSTKQQLSFLGMVGYFRLWIPGFAILTKPLYKLTGNLA  
DPIDPKSFPSSFHSLKTALETAPTALPDSSQPFSLHTAEVQGC AVRILTQEPGHPVA  
FLSKQLDLTVLAWP SCLRAAAAAALILLEALKITNYAQLTLYSSHNFQNLFSSSHLTHIL  
SAPRLLQLYSLFVESPTITIVPGPDFNPASHIIPDTPDPHDCISLIHLTFTPFPHISFF  
PVSHPDHTWFDIGSSTRPNRHSPAKAGYAIVSSTSIIEATALPPSTTSQQAELVALTQAL  
TLAKGLRINIYTDISKYAFHILHHHAVIWAERGFLTTQGSSIIINASLIKTLKAAALLPKEA  
GVIHCKGHQKASDPIALGNAYADKVARQAASSPTSVPHGQFFSFTSVTPTYSPETSTYQ  
SLPTQGWFLDQGKYLLPASQAHSILSSFHNLFHVGKPLARLLEPLISFSPWKSILKEI  
TSQCSICYSTTPQGLFRPPPPTHQARGFAPAQDWQIDFTHMPRVRKLYLLVWVDTFTG  
WVEAFPTGSEKATAVISSLLSDIIPRFGLPSTIQSDNGPAFTSQITQAVSQALGIQWNLH  
IPYHPQSSGKVERTNGLLKTSLQKLDWTVLLPLALLRIRACPRDATGYSPELL  
YGCTFLLGPNLIPDTSPLGDYLPVLQARQEIRQAANLLLPDPQPYEDTLAGRSVLV  
NLTPQTLQPRWTGPYLVIIYSTPTAVRLQDPPHWHHSRIKLCPSDSQPNPSSSSWKSQVL  
SPTSLKLTRISEEQ

>HERVH-RGH2

SIPPSTTHYSVLDLKHAFFTIPLHPSTQPLFVFTWTDPDTHQSQQLTWAVMLQGFGRSPY  
YFSQALSHDLFLHPSLLLIQYIGDVLLVAPPELLNKTHFLLOHLFSKGYPSKAQMSSPSV  
TYLGIILHNKTRALPADSVZLISQTPPTSTKQQLSILGMVGYFRVRIIPGFAILTKPLYK  
LTKGNLVDPIDPKSFPSSFHSLKTALETVSTLALPDIPTLFIHTAEVQGC AVRILTQGP  
GSHPVAFLSKQLDLTVLWGPSCLHAASAATLILLEALKITNYAQLILYSSHNFQNLFSSS  
HLTHILSAPRLLQIYTPFILPITIIIPGLDFNPASHIILDITPDPHDCISLIHLTFTPFPH  
ISFCPVSHPDHTWFDIGSSTRPNRHSPAKAGYAEVALIQALTLAKGLRVNIYTDISKYAF  
HILHHHAVIWAERGFLTTQVSSIIINASKKTLKAAALLPKEAGVIHCKGHQKTSDPIALGN  
AYADKVARQAASSPTFVPHGQFFSFTSVTPTYSTAETSTYQALPPQGWFLDQGKYLLPA  
SQAHSILSSFHNLFHVGKPLACLLGPLISFSPWKSILKEITSQCSICYSATPQGLFRPP  
PFPTHKARGFAPAQDWQIDFTHMPRVRKLYLLVWVDTFTGWVEAFP IESEKATAVISSL  
LSDIIPWFGLPFSIQSDNGPAFTSKSQAVSQALGIQWNLHIPZHPQSSGKVKPTNGLLKT  
HLTKLSLQKLDWTVLLPLALLRIRTCPRDAQGTPFELLYGRTFLLGPNLIPDTSPLGDY  
LPVLQARQESHQAANLLLPDPQPYEDTLAGRSVLVKNLTPQTLQPRWTGPYLVIIYST  
LTAVRLQDPPHWHHSRIKLCPLDSQPNPSSSSWKSQLLSPTS

>HERVH-RTVLH2

ASLTIPRLZHTHCHLFPSSKPPSHPLVSPLLNPQVZDTSIPSLVTDHAPLTIISLKNHP  
YPRQCQYPIQHALKRLKPVITRLLQHGLLKPINSPIHSPILPVLKPKAYRLVQNLHLI  
NQIVLP IHPMVPNPYTLSSIPPSTTHYSVLDLKHAFFTIPLHPSSQRLFAFTRLTLP  
RLQITWAVLPQGFDRPHYFSQAQVSSSVTYLSIILIKTHVLSLLIMSNZSPKQPF

QQLLSFLGMVSAVRILTQEPGPHPVAFLSKZLNLTVLAZPSCLRAAAATALILLETLKIT  
NYVQLTLYISHNFQNLFSSSHLMHYFLLPGSFSCTHSLLSPTITIVPGPDFNPASHIIPD  
TTPDPHDCISLIHLTFTFPFHISFFPIPHPIITLDLLMASTRPNCHTPAKADYAIVQATSP  
PLRTLISFSPWKSIPKEITSQCSICYSTNPQGLFRPPPFPPTHQAZGFAPTQDWQISFTZH  
APSQITXKYLLVZVDFTFTGZVDAFPTGSEKATVVISSLLSDIIPRFGLPTSISQHSRPAF  
IGEISQAFFQALSIZNLYIPYSPQSSGKVEQTNSLLKTHLTSSATNLKRTRQYFYHFPF  
SEFRPVLRLMLOGTAHLSSYRYSFLLGPSLIPDTRPIWTVLQKTCHPYLLSS

>HERV-Fc1

TKFPSRPQFPI SVEHRQGLKPI IITRLLQQHILIPVNSRCNTPILP IRKASGAYRLVQDLR  
IINEAVVPIFPVVPNPYTLLSRIPPTTTHFTVLDLKDFFFTIPLHPDCYFLFAFTWEDPD  
THVSSQFAWTVLPQGFRDSPHLFGQALAKDLSTCTLADSTLLLYVDDLLLCSPSLSVSQ  
DTATILNFLGKQGYRVTPHKVQLCTPTVTYLGISLTATTKSLTTDRVSLIKDLQLPQDAD  
KILSFVGLVGFRRHWIPNFGVLAKPLYQAAKETPTSPLSDPALVARHFHRLQQCLLTAPV  
VSLPNPLRPFHLYTDELQGVATGLLGQPVGPTYQVVAYLSRQLDPSTRGWQPCLRALAAA  
AELTKEALKLTLSHPLTVYSPHRLTDVLSHKCLAHLAPSRIQLFHVLFVENPDIITLTASP  
PLNPATLLPIEASEPPPVLSSHSCPELLTSNPNSRLGLFDRPLSNPDSTLFVDGSSVLT  
PCGRRQAAYAVVTHDKTVEAAALPLGTTSSQKAELLALTRALLLSQGQRVNIYTDSKYAYSIA  
HTHSVLWQERGFLTMKGTSSIVNGPLIHKPLNALQAPREVAIIHCKSHQHSKDPVAQGNL  
ADSTAKSLALTSAPAPAPAMFLSGSRTPAYSPQETFHLISNLKGMTDQDGZIWVDNRIAL  
PESQAQAIITDVHKTLIGPKLLHQFLEPIFLCPGLQSLIHQVHQTCAVCSTVNTQGGLR  
RPGPHHQLRGHQPGEDWQLDFTHMPRKHRYLLTLVDTFTGWIEAFPTARETGEVAVSV  
LLEHIIPRFGLPRSLQSDNGPAFVSKITQQVSESLRVTWKLIPIYRPQSSGKVERANSL  
KEHLTKLTLETKLSWVTLPLALTRRAAPRGPTGLSPFELLYGRPFLLPGLPPTVSPPP  
LASYPYLTLRLDLRKHADAQLPEPTPSSPDAPVVLSPGDSVLLKELQSKTLTPRWSGP  
YTVILTTPRATKLLGLPSWYHLSQLKKAPTQHDWSSKLTPTRLRITHPDLPHYASYS

>HERV-Fc2

PQVWDNTNTPVVAATHHKPVLIKLDPLKFPAPPQFPI SLEHRRGLKPI IIRLLQQHILIT  
NSPCNTPILPVRKASGTCLVQDLRLINEAVIPTVVPVNPYTLLSRIPPSRSHFTVLDL  
KDAFFSIPLDPACYFLFAFTWEDPDTGVSKQLTWTVLLQGFRDSPHFFGQALAQDLARCP  
LEASTVIQYVDDLLLCSPSETDCLKDTCTLLNFLGNZGYRVTPSKAQLCTSKVTYLGIRL  
TPNSKGLTSDRISLLQNLQPPQDAEDILSFLGLVGFRRHWVNPFGVLARPLYQATKQTPL  
GPLSEPKLVANLFNKLNCLITAPVLSLPNPLRPFHLFTDEREKVATGLLAQLVGRTHQP  
VAYLSKQLEPTVQGWQPCLQALAAAALKEALKLTLGHPLTVFSSHRLQDLLSHKCLSH  
LTPSRLQLFHLLFIENPHITLTSPTLNPATLLPCPEQDPASLHSCSZILSTLPPAHL  
SLQDNPILDPHQTLSDVGSSISTPQGQRRAAAYAVVTSSQVVEAKPLPTGITSQKAELIALTR  
ALILSKNKKVNIYTDSKYAYLIAHTYSILWQERGFLTTKGTPIVNGPLIEKLIQVLKAPT  
QVAIIHCKSHQNSKDPISLGNFANTTARATALLAPSPTPVCFLSPAYTPDYSPEELVHL  
MGRSGVKTNSNERFHSHTPNKSNQGWIFVDDRVLVPCSQKKLILDMHRSLSHIGPKALYN  
FLEPIIYHPSLYSLLKQIHQECHVCTVANPQKGLKLPGPCHQLREHQPGEDWQVDFIHMP  
RTKSSVIAPGPSDFLLRLLYRKALPDSQDGLCFQEIGSLGPGAVDHACNPRTLRGRG  
GQITZDREFKTQPEQHEETPSLLKIQIRSSPSPSPSPHGLPLNGAQAGVQWPDGLGSLQPP  
PPSCLPWPPKVPRLQPLRPRG

>HERV-W

NIGETPVCCPLLEEGINPEVWATEGQGRAKNARPVQVKLDSTSFYQRYPLRPAQ  
GLQKVKDLKAQGLVKPCSNPCSTPILGVQKPNRQWRLVQDLRIINEAVPLZPAVSPYTL  
LSQIPEEAWEFTVLDLQDAFFCIPVHPDSQFLFAFEDTSPTSQTLTWTILPQGFRDSPHLF  
GQALPRLEPILIPGHLSFGVDDLLLAHSETLCHQATQAFNFLATCGYMVSKPAQLCSQQ  
YLGLKLSKGTALSEEHIQPI LAYPHPKTLKQLRGFLGVI GF CRKI PRYGEI ARSLNTL  
IKETQKANTHLVRWTTVEVAFQALTQAPVLSLPTGQFSSYVTEKTGIALGVLTQRGMSL  
QPVAYLTKEIDVAKGZPHCLRVVAVAVLVSEAVKIIQGRDLTVWTS HDNGILTAKGDLW  
LSDNCLLKCQALLLEGPVLRCTCATLNPATLPDNEEKIKHCQQVISOYATRGDLLEVP  
LTDPDNLNYTDGSSFVEKGLRKVGAVVSDNGILESNPLTPGTSQAQLAELIALTWALELG  
EEKRANIYTDSYAYLVLAHAHAIWKEREFLLTERTPIHQEAIRKLLLVQKPKAVLHC  
RGHQKGEREIEQCADI EAKRAARQDPPEMLIKQPLVZGNPLRESPSTQQEKQNGEPH  
EDSFLPSGRLATEEGKILLPATIQWLLKTLHQTFFHLGIDSTHQMAKSLFTGPGFLFKTIK  
QIVRACEVCQRNNPLPYRQAPSQEQTGHYPGEDWQDFTHKPKPQGFQYLLVWDTFTGWA  
EAFPCRTEKAQEVIKALVHEIIPRFGLPRGLQSDNSPAFQATVTQGVSAQALGRYHLHCAZ  
RPQSSGKVEKMNETLKGHLKQQTQETHLTPALLPIALKRICNFQKAGLSPYEMLYGRPF  
ITNDLVLPKTANLVADITSLAKYQQVLTQGTYPZEEGKELFHPCDMVLVKSLSNSPSL  
DTSWEGPYPVILSTPTAVKVAVGESWIHTLESNPGYCQRNLKIRRQR

>HERV-FRD

LTHGLISCNSPYNTPIILTVKKTNGEYRLVQNLZVINEAVVRIHPMPQPLCNSRRFPDAQW  
FSVLDFKNFFCIPLDPSSQFIFVLELENEKGRSZQLTWTVLPQGFDRDSPHLFGQALARYL  
QDLSLYMGHLLQYMDLLICSPTRRELGIQHNLFLADRRYKVS KAKTQLLRQAIQYLGII  
MSLKEHKLSAEZIQAILRITPTTQKQFZAF LGITRYCRLWILECGGI IKS LYQALKEGTN  
RDTIWEKNQEQA FRZLKTALSQAPALELPILT KPFQFFITEKAGIALGVLTTETFGPVKHA  
VGYFSKNLDPAAQWWPHCLKVVGTAALILEEDFNITMGQSIWLLMSHQIDPLLNLKGPZW  
LTDNTLIK YQVLLLENPQVTVEQCSTINPALLLP LPGDDNSTYSCEILNKIYASWEDLK  
DQPIDNPKIWFSDGSSFVRDGTTRYAGYATESHHQVVETKALSPGTSVQLAEFITLTRAL  
KLGCRKRITIIYTD SKYAFLVLHAHMAIWKERRYLTAQDAPIKYGSQVLELLEAAHLPQEV  
AVEHCEGHRGFYZTTWGNRLADKNAEEAAMSNDTFMGDLFLSLPSEL PFLQYTKEEIDW  
SSQHGYKEETSGWYRLEEF SIYLPMESLQ GKAFHWEVDGEIGGEMKLAGRWRKVWGILV  
DAELVVGVCVLSLLVRVYSESTLQTVLGRAPISIPFFFS AIMQIGAIPKIVILEKMGPKM  
EPPNGVIKSFYNFFHLAKDSL GQICKZVFSGKGLNKTIQQVCQAYTLCTINNSQRGKPPP  
LISPIQRSTYPGEDWQMDFTHL PAGFRZKYLLVCVDTFTKWVEACSTKTEKAQEVAKFL  
LKECISW FELPRSLQSDNGPSFISZVTQQVSRVSKHKCTFTLPGDQPSGKVERTKETLE  
HI LNKL CQKTAQ PWDLLLLLAPLWIHIAPQTPLQLIPFEALYGKPFLYSDLMLDEKTAKI  
TYCVSSLAGFQQALQEFWLQRKPKSEGEKYQPLYPPGSLVLKAWRDGTLNSQLTPVRRG  
LFTLRAIKVSEIVSWIHHLSEAMERLQNTSRGSNALSSRTHLRGT

>MER4like

PILLLQDRLFVSSLETNINPEVWATQGEIGQARTSTLIWIHLKDLTSFPNQKQYPLKPEV  
RKGLEAIDNLRMQGLLKL CNSPCNTLT LGVQKPNKEEWRLVQDLHTINKAVVS IHLVVP  
NPYILGTKWFTVLDLKD AFFLHTIIPSSQYLFAL EDPSNRFTTQLTLMVLPQGFZDSPHLF  
GKVL SKGLSEFLYPQVKVLYVDDIPLGFPSEKISQ EGRKALLNYLANRRYKVS KSKSZL  
CQTSVKYZGLVLS DGT RMLGEERIKPISFLPLPQTLNQLRRL LGITGFCRLHTPGYGVTV  
ZHFYHLIKETKAAKSHSLICKEAAKRTFLVNPEYVRQVSVNLES LFCQZKHAPMTQPQE  
ILMTCISQGGSSSLVYILGRYETPINICKMNI VQSGEVG LEAKAEKLVRRGLSGHRZI  
RDKRMIPLSFZL ASPNEAIRYAFILASSGLILNRMGGSLPZVVS SLTFTFSLVILGPQDZ  
FSFYRPVKTSLAKGTSLSLPIRELFNLYVLERKRMALGVLTAZQGPAQQPIGYSKEFNL  
VAKRWSACRQAVALLVPEATKLTGKNNIAIHTPHNVAELLSSGESLDYGQLLPQIIS  
SAIRGICSPVKKLSLPKPSHLLPSES WGANITANTSANLHSQRGPERNPLRETTLDLWR  
SSFVEQRIQKAGYAAIILNNIESTLLS WAAQSQIAELIALKRRELSK GKAVNISTDTKY  
AFLVPSAHATIZKERDFLTPMGLPLNTIRILTRLLSLIFLPWEVAI IHCKGQQKGTYKIA  
EGNKLAEQAAKLSVKGPEISDPLEPPLIERLHKRNKTSVFLCGDGMGHFLNIPFSPQDGC  
NERMANFIYQLPDNEKHKT LHQAFPLGQDKTYLLAQRLFTGKNLLKMAKQVANALKTALK  
IIPSIDGFFPLEPKDCEATHKDWQMDFTHIPMIRGLQFLLVWVDTFTNWEAFPCCTENA  
SEVRKVLITEKIPHFGLPWYLQTDY GSCFKAVVNQAGAGGARSSKTYKTVFSAWRPQFSE  
KVEKTSDIIRKLSQETHLPQIILHVALLCVRHTPLKLG LNLLSLFEMVYRZPFLTNDCLL  
DQZTSDLIKHVTS LAICQQELKQLLEAQ SHEPRPPLFDPGDLVLIKALLSLSSTLGLKLLK  
GCYTVLLPTPTAVKVTGIDSCINYTZVKAZGTD RITSFDP EEHPSSSVMKSDPKLKTTKD

>WDSV

DPIDCPYEKSGTKTTQDVITTKNAEIMVTVNHTKIPMLVDTGACLT AIGGAATVVPDLKL  
TNTEIIAVGISAEVPVHLAKPTKIQI ENTNIDISPWYNPDQTFHILGRDTLSKMRAIVS  
FEKNGEMTVLLPPTYHKQLSCQTKNTLNIDEYLLQFPDQLWASLPTDIGRMLVPPITIKI  
KDNASLPSIRQYPLPKDKTEGLRPLISSLENGILIKCHSPCNTPIFPIK KAGRDEYRMI  
HDLRAINNI VAPLTAVASPTTVLSNLAPSLHWFTVIDLSNAFFSVP IHKDSQYLFAFTF  
EGHQYTWTVLPQGF IHSPTLFSQALYQSLHKIKFKISSEIC IYMDDVLIASKDRDTNLKD  
TAVMLQHLASEGHKVS KKKLQLCQEVVYLGQLLTPEGRKILPDRKVTVSQFQQPTTIRQ  
IRAF LGLVGYCRHWIPEFSIHSKFLEKQLKKDTAEPFQLDDQVEAFNKLKHAIT TAPVL  
VVPDPAKPFQLYTSHSEHASIAVLTQKHAGRTRPIAFLSSKFDAIESGLPPCLKACASIH  
RSLTQADSFILGAPLI IYTTHAICTLLQRDRS QLV TASRFSKWEADLLRPELTFVACSAV  
SPAHL YMQSCENNI PPHDCVLLTHTISRPRPDLSDLPIDPDMTLFS DGSYTTGRGGAAV  
VMHRPVTDDFII IHQQPGGASAQTAELLALAAACHLATDKTVNIYTD SRYAYGVVHDFGH  
LWMHRGFVTSAGTPIKNHKEIEYLLKQIMKPKQVSVIKIEAHTKGVSM EVRGNAAADEEA  
KNAVFLVQRV LKKG DALASTDLVMEYSETDEKFTAGAE LH DGVFMRGDLIVP PLEMLHAI  
LLAIHGVSHTHKGGIMSYFSKFWTHPKASQTIDLILGHCQICLKHNPKYKSRLQGHRPLP  
SRPFAHLQIDFVQMCVKKPMYALVIDVFSKWEPIIPCNKEDAKTVCDILMKDIIPRWGL  
PDQIDSDQGTHTAKISQELTHSIGVAWKLHCPGHPRSSGIVERTNRTLKSKIIKAQEQL  
QLSKWTEVLPYV LLEMRATPKKHGLSPHEIVMGRPMKTTYLSDMSP L WATDTLVTYMNKL  
TRQLSAYHQVVDQWPSTSLPPGPEPGSWCMLRNPKKSSNWE GPFILLSTPTAVKVEGR  
PTWIHLDHCKLLRSSLSLSSSLGGPVNQLLS

>hg15-chr3-152465283



PTDIGRIKSVQPMKVQIDHPKPLPKLPQYPLKSEAIQELZPIVEDLIKQGLILPCRSPCN  
TPILAVKKPRMRLKICSRFTGNKIVIPRFVVPNSNILLSNVPTFQVFTIIDLCSAFFS  
IPVYKESQYZFAFTWZNQQYTWPVMPQGFQSPFYFSQALHQDLMTLQLPQNSTLIQYIDE  
YMLPTKECSVMDSVYLLQQLSYKGHKASVEKLFKFSRQKVHHLGCDLAAEGISLSTKRITA  
IQSFPZPATKRQLRSFLGLAGCCRFZVPIFSLIASPLYELTNNAIPEPLPWEDSHEQAVG  
QIKLTLQQPSSLGLPNYTKPFTLHVHECENNQALGVLAQEHGGEHRPIAYYSLQLYPVTKA  
YPNZLKAAA AVAKLVETSSDLVLGNELNLQITRCVKS IKFQPNPHFSVSRLTSYELLLS  
PSNLHLKTVIYLTLILLSLPNDGEDHNCVSMIDLALCPHRNRTLNCNNPCGDYZIMGVG  
LFHAVLMIVNSLMRSDGFIKGNSPAHALVCHHVRRYFATHSLLLPPQPCGTVSZLKTSFLH  
KWPSLRVYFISSENRIILVNSEIVALHVDFZDTPLDNPELIFFIDGSYVRNSEGKFQARY  
TVTTQNELIEKGTLPQFKLAQPAELFALTZVCHIAKDKSVNIYTDSRCAFGLHDFGMI Z  
KLZGFFTSSGTP IKNZLKVDELFSAILLLLQVAVVKIEAHTCRTELESQDNALADVYAES  
GSAETVKICNLNELHKINPSQLPYDDL FNKQC NASHLEKQNWYLGCKFNVKQTHSPDSC  
LVLPESLKLP LLKALHSTTHHGTDKMIQLEKNTGGVTSKTAKMVYNQCLTCQSNNPGKTI  
KVSGNICLPPDGVFZHLQIDFIQLSPSMGYQYILAIVCMFSGWIEAFQCSKADAVKKLEN  
LFPFLGDPEKSSDRGTHFIGQVIKQLNKVLPQRHYHCPYHPHSSEKVERTNVI LKQL  
AKLTESI GLPWPKVLP LALMAIRSTFIGKHLTPYEIVTGRPHAS PALLNSDITKYCKAL  
MHYAKVYFCQVKEFTZDPLTEQSDPPHGLEPGDWVFWKQYQRKTI FEPCWKGPYQVLTTH  
TAVKLQGLEPWWHVSQ LKRTPSDLWNCTPVGDFDKVDQGNLSPGRDPS

>Xen1

QTEAISLCSVPLLLFTDLTAISDCNIPAHVLSRIPPVLWSQGPEDIGRLRVPPVAVCLKE  
GAVLPRKPQYPLKPAQSESINKQLQTLENGAIKRQSSPCNTPLFPVKEKKGKAGEPDKYR  
LVQDLRAVNEATVMETPLVSNPHTILSGIPPSATHFRAVDLTNAFYSIPLREDCQYLF AF  
THERQQYVWTVLPQGAQNSPTHFSLALTSILDSWISSHPEITLLQYVDDLLL CAPDLPTC  
EASSTDLLSFLADQCGCKASKEKLQWCQTTVVFLGQCISQGTRHITTEGRIKTLQDIPLPKG  
HKPLHAFGLLISYCRSERWIEASLLMQPLYDVLKSDPFTMTPAEDSFHTLKSILSIAPAL  
GLPDYKPKFLFVSRQGHAVLQAQSYGRIPIRPIGYFSGQLDNVAKGSPSCMRVYAAR  
LLDKTADLILGHECTLLAPHDIAAILNQTQPKHMSAARPTAQCAVLLPDNVTLQRCTIL  
NPSTLLPIPEPGVEGHAVDFHDCFELMQQETAHLPTVSDTALDNPDLTLFVDGSRFSDA  
SGKFHTGYAVTTTDSVLEAQPLPASCQAQEAELKALTAACKLAAGKRANIFSDSRYAQGV  
ALDFGTIWKTRGYLTATGSP IKNGRSVADLMEALTLPEQVAVLKVKAHGRLTSPEAIGNH  
LADTTAKEIAVAPLPDAPPLTTSTPLSKLHSWTVLTNYKLAKQPAPKKSTDGSARGQLV  
KTAYSCNKKPCIPRSLYPSLVQWAHGPTHVSKNLMNNLISKLYFAPGITTLTRNYTAACT  
ICAQCNPGRMEKPPVNLAKPLYPFQRIQIDHIQMPRCGRFEYVLVVDMFSGWPEAFPV  
ANMTAKTTAKLLSEIVCRYGVPEVIESDQGPVFTASVTKDIWTALGVTLHFHTPYHPQS  
SGKVERMNGTLTKTKMLKMSQDSGMLWPDSLPIALFSVRYTPRGVNNLSPFEILFGCAPRL  
GCYFPQTLQLQFDVLENYVCQLSNELSKVHGQVFSSIPDPTSVEGSHSLVPGDWVLVKKF  
LRKSSLEPRFDGPFQVLLTTATSVKLDGKNTWIHASHCKKSAPPASPASDSAPSILP  
ASP

>ALV

TVALHLAIP LKWKPDHTPVWIDQWPLPEGKLVALTQLVEKELQLGHI EPSLSCWNTPVFV  
IRKASGSYRLLHDLRAVNAKLVVFGAVQQGAPVLSALPRGWPLMVLDLKDCCFFSIPLAEQ  
DREAF AFTLPSVNNQAPARRFQWKVLPQGMTC SPTICQLVVGQVLEPLRLKHPSLRMLHY  
MDDL LLAASSHDGAEAGEEVISTLERAGFTISPDKIQREPGVQYLYGKLGSTYVAPVGL  
VAEPRIATLWDVQKLVGSLQWLRPALGIPPRMLMGPFFEQLRGS DPNEAREWNLDMKMAWR  
EIVQLSTTAALERWDPALPLEGAVARCEQGAIGVLGQGLSTHPRPCLWLFSTQPTKAFTA  
WLEVL TLLITKLRASAVRTFGKEVDILLLPACFREDLPLPEGILLALRGFAGKIRSSDTP  
SIFDIARPLHVSLKVRVTDHPVPGPTAFTDASSSTHKGVVVWREGPRWEIKEIADLGASV  
QQLEARAVAMALLLWPTTPTNVVTD SAFVAKMLLKMGEVGPSTAAAF ILEDALSQRSAM  
AAVLHVRSHSEVPGFFTEGNDVADSQATFQAYPLREAKDLHTALHIGPRALSKACNISMQ  
QAREVVQTCPHCNSAPALEAGVNPRGLGPLQIWQTDFTLEPRMAPRSWLAVTVDTASSAI  
VVTQHGRVTSVAAQHHWATAIAVLRPKAIKTDNGSCFTSKSTREW LARWGIAHTTGIPG  
NSQGQAMVERANRLKDKIRVLAEGDGMKRIPTSKQGELLAKAMYALNHFERGENTKTP  
IQKHWRPVTLTEGPPVKIRIETGEWEKGNVWVWGRGYAAVKNRDTDKVIWVPSRKVKPD  
VTQKDEVTKKDEASPLFAGISDWIPWEDEQEGLQGETASNKQERPGEDTLAANES

>gg01-chr1-156168845

RATVYHRALHF AIP LHWKREASPVWVDQWPLPTDKLAALTQLVSRELEAGHIEPSLSRWN  
TPIFVIRKPLGSRLLHDLQAVNAQLVQFSPVQQGDL SLAAVPRGWPLMVIDLKDCFFSI  
PLAEQDREAF AFTVVRNNQGAQRFQWKVLPQGMACSPTICQLVNTI IAPVRRDMPDC  
QIVHYMDDL LLAAPTGSQ LQALEARVSGALTGAGFTISQEKVQRGPGIEFLGYKFGSSTV  
IPEGLEIKPHVTNLWDVQKLVGAIQWVRGALGIPPRLMKALYDQLKGS DPRERREWTPEM

DAAWQEILSLCSTASLSRWTPGIPLGAVTRCQDGAVAVIGHALGSCPQLRWLFPVAVRA  
FTPWVELLSLLLSKARTAAFRDFGKDLIDIVHLPRFFRDSQILPDEILLALHGMGGKLRYA  
GSLPIFELARPLWVSLRLRVVASPLDGPTVFTDASSLTGQGAVVWKNQTDGWEIRTFQDH  
GVSVQTLLEAWAVAMALLLWLETPCNVVTDASAFIAKMLLRMGQEGPIPPHYCGSPQFNDDTD  
LANETVDNVGKVKVACVICRLNVSLPWEPQELLLLGSQGVNPDWTWNTTWLSPGCIGFAKV  
PNHNYSLLDSISQKGPYWYSRINRSDPFTDVFPRDRTHITGEKSIIVTRQTKPHSCCLTT  
APGIWISVDTTVTIARPDGFPRNLTCSGYNAGGSNTSGCCVGPALRGQEGERTSGIMTQL  
KHCRQVFIGDHAWQGI PVKLVGGPCYLGQLTVLSPKVSEWLQIMNRTRMRTRKRDLOQLS  
PNCSEDEVLRWGMTARVFASLFVPIGAAQVLKEIERLACWSVKQANATTLVLNEMLEDMNS  
IRRALLQNWAAIDFLLLAQSHGCEDEVEGFCCFNLSDHASIAHKQLQWMQGHGTQKIKVLAD  
PFGEWLESFGELEPWLKQMLKTLIVGLAIFLAIMLSSMLCSAS

>MPMV

LTAADILAPQQCAEPI TWKSDEPVWVDQWPLTNDKLAQAQQLVQEQLLEAGHITESSSPW  
NTPIFVIKKKSGKWRLLQDLRAVNATMVLMGALQPGLPSPVAIPQGYLKI IIDLKDCFFS  
IPLHPSDQKRFAFSLPSTNFKEPMQRFQWKVLPQGMANSPTLCQKYVATAIHKVRHAWKQ  
MYIIHYMDDILIAGKDGQQVLCQFDQLKQELTAAGLHIAPEKVQLQDPYTYLGFELNGPK  
ITNQKAVIRKDKLQTLNDFQKLLGDINWLRPYLKLTTGDLKPLFDTLKGDSDPNSHRSL  
KEALASLEKVETAIAEQFVTHINYSPLIFLIFNTALTPTGLFWQDNPIMWIHLPASPKK  
VLLPYDAIADLIILGRDHKKYFGIEPSTIIQPYSKSQIDWLMQNTMMP IACASFVGI  
LDNHYPNKL IQFCKLHTFVFPQII SKTPLNNALLVFTDGSSTGMAAYTLTDTTIKFQTN  
LNSAQLVELQALIAVLSAFPQNPLNIYTDASAYLAHSIPLLETVAQIKHISETAKLFLQCC  
QLIYNRSIPFYIGHVRAHSGLPPIAQNQRADLTKIVASNINTNLESAQNAHTLHHLN  
AQTLRLMFNIPREQARQIVKQCPICVTYLPVPHLGVNPRGLFPNMIWQMDVTHYSEFGNL  
KYIHVSIDTFSGFLLATLQGETTKHVITHLLHCFSIIGLPKQIKTDNGPGYTSKNFQEF  
CSTLQIKHITGIPYNPQGGIIVERAHLSLKTTIEKIKKGEWYPRKGTPRNINLHALFILN  
FLNLDDQNKSAADRFWHNNPKQFAMVKWKDPLDNTWHGPDVLIWGRGSVCVYSQTYDA  
RVKWPQKYNKNMVLNLTVLEDMFP PHRLTLLQLFLALLILLIQZQTPZNGSVCQLPLPLA  
IHI ZEVVPVNATRSHMILYMLAITTINNVTLVIKHISLPLZLEIELLPLVTGMSLQYZG  
LVTTSLQQAVPMVKRAKWSVGIADLLFIYLMEEGLKIRPATLZZIKSLRNCTGRCSQNFL  
TILWPCPKPVVKKLTHLTLISLPLYIVYSMLPNPVZPKIAGCAYSQEI PFLPCPIMIH  
SALTLPVYLITPALZPPLFZYSPLTSLIPIAFTLI IKTTHLTZMZVZLALLIALAIITFL  
QPPNPLIPYAPQTARFLYAVTIRHTLIYPQIGREVVYLLLFQPIZTSFQVVSLSPFQLLI  
IFZAKPKEQSNLSPCSZGZVZLLQYLLGLLVZGFPSLNIQNYLINZYQMFKLFLALYKIS  
KIRZTLZQKZYCKTEEDZIYLQQSREVSZPYRKNVSTPINLESSETRLKTYKTTZKDA  
EDNZSTTHFGPVFMDSSMLCPYZALCFAYCLCYLSVQLFSTSLZPLLNIKLRSRPNLY  
KSI IIALNKKTVVAHI ZPZHRPPPLZARLDSQZRVREZHFSLTZDRRAVKATAZSNDGZZ  
ZQEMYHSNLRQAQPPRDVSVFVYNZKGZHVRSRAARMMSWPLFALAPCYEFKMAFYLVLL  
RLTFPPARMFPALGLTWLSLLCYZACAQYLSPTCCLCIZGNTLPPLNETZSEHCLVSI  
CVSCSLQFPLPPPYSYCZSRGSGQFSFVRSRAARMMSWPLFALAPCYEFKMAFYLVLLR  
LTFPPARMFPALGLTWLSLLCYZACAQYLSPTCCLCIZGNTLPPLNETZSEHCLVSI  
VCSLQFPLPPPYSYCZSRGSGQLAPNVGHEX

>JSRV

MMHMGALQPGLPTPSAIPDKSYIIVIDLKDCFYTIPLAPQDCKRFAFSLPSVNFKEPMQR  
YQWRVLPQGMTNSPTLCQKFVATAIAPVRQRFPPQLYLHYMDDILLAHTDEHLLYQAFSI  
LKQHLSLNGLVIADDEKIQTHFPYNYLGFSLYPRVYNTQLVKLQTDHLKTLNDFQKLLGDI  
NWIRPYLKLPTYTLQPLFDILKGDSDPASPTLSLEGRTALQSIIEAIRQQQITYCDYQR  
SWGlyILPTPRAPTGVLYQDKPLRWIYLSATPTKHLPPYELVAKIIAKGRHEAIQYFGM  
EPPFICVPYALEQQDWLFQFSDNWSIAFANYPGQITHHYP SDKLLQFASSHAFIFPKIVR  
RQPIPEATLIFTDSSNGTAALINHQTYYAQTSSAQQVVELFAVHQALLTVPTSFNLF  
TDSSYVVGALQMIETVPIIGTTSPEVLNLFTLIQQVLHCRQHPCFFGHIRAHSTLP GALV  
QGNHTADVLTKQVFFQSAIDAARKSHDLHHQNSHSLRLQFKISREAARQIVKSCSTCPQF  
FVLPQYGVNPRGLRPNHLWQTDVTHI PQFGRKLYVHVSIDTF SNFLMASLHTGESTRHCI  
QHLLFCFSTSGIPQTLKTDNGPGYTSRSFQRFCLSFQIHHKTGIPYNPQGGIIVERAQR  
IKHQLLKQKGNELYSPPHNALNHALYVLNFLTLDTEGNSAAQRFWGERSSCKKPLVRW  
KDPLTNLWYGPDPVLIWGRGHVCFVFPQDAEAPRWIPERLVRAAEELPDASDATHDPE

>MMTV

MIGAIENL FADQISWKSQDPVWLNQWPLKQEKLQALQQLVTEQLQLGHLEESNSPWNTP  
VFVIKKKSGKWRLLQDLRAVNATMHDMGALQPGLPSPVAVPKGWEII IIDLQDCFFNIKL  
HPEDCKRFAFVSPSPNFKRPYQRFQWKVLPQGMKNSPTLCQKFVDKAILTVRDKYQDSYI  
VHYMDDILLAHPRSRIVDEILTSMIQALNKHGLVVSTEKIQKYDNLKYLGTHTIQGDSVSY

QKLQIRTDKLRTLNDFQKLLGNINWIRPFLKLTGELKPLFEILNGDSNP I STRKLTPEA  
CKALQLMNERLSTARVKRLDLSQPWSLCILKTEYTPTAACLWQDGVVEWIHLPHISPKVIT  
PYDIFCTQLI IKGRHRSKELFSKDPDYIVVVPYTKVQFDLLLQEKEDWPISLLGFLGEVHF  
HLPKDPLLTFTLQTAIIFPHMTSTTPLEKGIIVFTDGSANGRSVYTIQGREPI IKENTQN  
TAQQAEIVAVITAFEEVSQPFNLYTDSKYVTGLFPEIETATLSPRTKIYTELKHQLRIH  
KRQEKFYIGHIRGHTGLPGPLAQGNAYADSLTRILTALESAQESHALHHQNAALRFQFH  
ITREQAREIVKLCPCNCPDWGHAPQLGVNPRGLKPRVLWQMDVTHVSEFGKLYVHVTVDT  
YSHFTFATARTGEATKDVLOHLAQSFAYMGIPQKIKTDNAPAYVSRSIQEFLLARWKISHV  
TGIPYNPQQAIVERTHQNIKAQLNKLQKAGKYTPHLLLAHALFVLNHNMDNQGHATA  
ERHWGPISADPKPMVMWKDLLTGSWKGPVTLITAGRGYACVFPQDAETPIWVPDRFIRPF  
TERKEATPTPGTAEKTPRDEKDDQESPKNESSPHQREDGLATSAGVDLRSGGGP

>HML1

KPPEPIPLTWKTQKPVVWDQWPLPKNKLEALHILVLAQLKLGHI EPSFSPWNSPVFVIQK  
KSGKWRMLTDLRAVNAVLPQMGTLQPLSPTMIPEYWPLIIIDLKDCFFTVPLAPQDFE  
KFAFTVPTLNNVAPAARYHWKVLQPGMLNSPTICQYVVCILKPVDRKFPQCYIIHYTDD  
ILCAAPSRVLI SCFSALQQAVTAAGLVIAPEKIQTSSPYHYLGMQLEDKVIKPKVQLR  
RDSLKTLNDFQKLLGDINWIRPSLGIPTYAVSNLFATLRGNPDLRSKRSLTPEADSELRL  
IEKCIQQSQVTRVNPFLPFEILIFPTEHSPTGLIIQGHNLIEWCFLPHSSLRMLTIYLDQ  
ISTLIGQARSHLLRLSGTEPQKIIVPLTRLQVQAFATCIAWQVHLAGFPGIIDNHCPNV  
KLFQFLKLTSWILPNVTRNTPLPEAVTVFTDASSNGRAAYTGPRERVLNTGAI SAQRAEL  
LAVRAVLEEFPEPVNIVSDSAYVVHVVAHNIETALI QFMPDDTFLFQKFQSVLRARSSPFY  
ITHIRAHTPLPGPLSAANARADTLVPIFTDAENFHALTHVNAAGLRNKFPLTWKQAKII  
VRHCPTCQVLILQPLSSGVNPTGLSQNALRQMDVTHYPPFGKLSFIHVTIDTFSHFIWAT  
CQTGESTAHGKRHMLSCFSVMGCPEKLTNDNGPGYTSAAFKKLPTWAIHTTGI PYNR  
GQALVERAKKTLKQDLRQDTKLKGDAVTPHAKLNLALFTLNFLNLTRNQPFATAEQHFT  
VNKFDPPQKGMRVWVKDVKTNRELGTVITWGRGFACVSPGKGLQPVVWVSRQLKLLHNSK  
DETLPETKGDPSSETKEQLSPDPTYP

>HML2

KSKKRRNRVSFLGAATVEPPKPIPLTWKTEKPVVWNQWPLPKQKLEALHLLANEQLEKGH  
IEPSFSPWNSPVFVIQKSGKWRMLTDLRAVNAVIQPMGPLQPLSPAMIPKDWPLIII  
DLKDCFFTIPLAEQDCEKFAFTIPAINNKEPATRFQWKVLPQGMLNSPTICQTFVGRALQ  
PVREKFSDCYIIHYIDDILCAAETKDKLIDCYTFLQAEVANAGLAIASDKIQTSTPFHYL  
GMQIENRKIKPKQKIEIRKDTLALNDFQKLLGDINWIRPTLGIPTYAMSNLFSILRGDSD  
LNSKRMLTPEATKEIKLVEEKIQSAQINRIDPLAPLQLLI FATAHSPTGIIIQNTDLVEW  
SFLPHSTVKTFTLYLDQIATLIGQTRLRI IKLCGNDPDKIVVPLTKEQVRQAF INSGAWQ  
IGLANFVGIIDNHYPKTKIFQFLKLTWILPKITRREPLENALTVFTDGSNGKAAAYTGP  
KERVIKTPYQSAQRAELVAVITVLQDFDINIISDSAYVVQATRDVETALIKYSMDDQLNQ  
LFNLLQQTVRKRNFPFYITHIRAHTNLPGLTKANKQADLLVSSALIKAQELHALTHVNA  
AGLKNKFDVTKLAKDIVQHCTQCQVLHLPTQEAGVNPRLGCPNALWQMDVTHVPSFGRL  
SYHVTVDTYSHFIWATCHTGESTSHVKKHLLSCFAVMGVPEKIKTDNGPGYCSKAFQKF  
LSQWKISHTTGI PYNQQAIVERTNRTLKTLQVQKEGGDSKECTTPQMQLNLALYTLN  
FLNIYRNQTTTSAEQHLTGKKNPHEGKLIWVKDNKNKTWEIGKVI TWGRGFACVSPGEN  
QLPVWIPTRHLKFYNEPIRDAKSTRGDGDTAIEHR

>HML3

KWLTDKPIWIEQWLLSKDKLEALEKLVTEQLENGHIAPTFSPWHSPVFVIKKKSGKWRML  
TDLRAINVIQPMGALQPLSPAIIPKNWPLIVIDLKDCFFTFPLAKQDCEQFAFTIPAV  
NNLQPAKHWHKVLQPGMLNSPIICQTYVQAIEPTRENFQCHIIHYMDDILCAAPTRIEI  
LLZCYDHLZNLISRAGLI IAPDKIQTTPYSYLGNLVNDTTIVPQKVTIRGDQLKTLNDF  
QKLLGDINWIQPALGIPTYAMSNLFAILRGNSVTSWPQLTKEAEAEQVIEKQVHKAZI  
NRIDPEKTLDLRIFSTQHSPTGVIVQEQDLIEWLFLPHTNSRTLTHLNQIAIMIGIGRTW  
IVKZHGYDPGKIIVPLTKAQIQQFVNSLWQTHLTDVFGSLNNHFKMKLQFLKLTNWI  
LPKITKFKPIEGAENVFTDGSNGKASYFGLKGVFQTPSAQKVELVAVIEGLTAFDMP  
NAISNSSYVHSTQLIENAQLRFHTDEQLMTLFTQLQTVVRSRMHSFYITHIRAHTPLPG  
PLTEGNQADRLIANAI SNARHFHNSTHVNASGLQCRYSITWKEAKAIIQZCPTCQMVHS  
SSF TGGFNPRGLEPNSLWQMDVTHVPSFGRLAYVPVCVDTFVSHCVWTTCSGESSACVVC  
HLQCFVVMGIPASIKTDNATGYTNQALATFFSVGNIKHITGIPYNSQQAIVERMNL SLK  
QQLQKQKGRDREYGTPIQLNLALLTLNFLSLPKGQKLSAAEQHLQKLAAKTETEKL IWW  
RDPITKSWEIGKII TWGRGYACISPGQNQLIWLRSRLKPYHEPDAKEATPGDPEPDSV  
AAMLRLTLGGP

>HML4

KWLTDKPIWMEQWPMSEKLEALENLVTEQLEKGHIAPTFSPWNSPVFIIKKKSGKWRML

TDLRAINS LIQPMGTLQPLSPAMIPKNWPLIVIDLKDCFFTMPLAEQDCERFAFP IPA  
VNNLQPAKCFHWKVLPOGMLNSPTICQVYLGQAIESTCKKFSQCYIIHYMDDILCAAPTR  
EILLQCYDHLQNLISHAGLITAPDKIQTTPAYSYLGTLVNDTTIVPQKVTTHRDQLKTSN  
DFQKLLGDINWIZLALGIPTYAMS NFLSILRGDPSLISPRQLTKETELEVELQLIEKQVHKA  
QINRINPKKTLDLLIFSTQHSPTGVIVQEQDLVQGLFLPHTSSRTLTPYLDQISTMIGNG  
RTQIDKLHGYDPGKSIVPITKAZIQQAFINSLTWQTHLANFVVGILDNHFPMKMLFQFLKL  
TNWILPKISKFKPIKGAENVFTDGSSNSKASYSGSKGKVFKTPYMSAQKAELVAVIKVLT  
AFNMPINVTSDSSYVHSTQLVKNAQLZFHTDEQLMTLFTQLQKAVRSRMHPFYITYIRA  
HTPLPEPLTEGNQMADHLVATAISNARHFHNLTHVNASGIKHRYSITWKEAKAIIQZCPT  
CQMVHSSSF TGGVNP RGL EPN SLWQIDATHVPSFGR LAYVHV CVDTFSHFFWATCQSGEF  
SACVKYHLLQCFVVTSSISASIKTDNASGYTRQAVATFFSIWNIKHITGIPYNSQGQAI VE  
ZMHL S LKRQLQKQKAGNRDYGTPHMQLNIALLTNFLSLPKGQMLSAAEQHLQKPAAKTV  
AEQLVWWRDPITNSWEIGKNIITWGRGYACVSPGQNHQLIWIIPSRHLKPCHEPARSWGPP  
GCSHV

>HML7

QWMCESPVZVEQWPLFKHKLEALIEIVNDLLQANTIEPSLSPWNSPVFVQKKS GKWRMV  
TDLRAVNAV I KPMGALZPSMPSPSMIPKEWPLIIIDLKDCFFHIPLDKSDCEKFAFTIAS  
INNSASAARYQWKVLSQGMINSPTICQFVGTVLQPIRQTFKNNYILHYMDDILIAAPT KD  
ELIQCF TSI EZAVANAGLNIAPDKIQQATPFLYLGMLQLEARSTKPKVQLHTTLNTFNDF  
QKLLDINYL RPTLGIPTYALSHLFATLSGSDSLNSPHSLTEPAKQELSFVEZVREAQISC  
IDPNLPLQFLVFP SIHSPMELIVQNDLSLVEWVFLPNSASKTLSIYLDQMATSFDLVIRQR  
ITKISSFDPDIFVVP LSKNEVKNAFSTSLCWQTNLADFIGTIDNHLPKSKFFQFLZNTSW  
TLKKLTRSSPLEAATTIFTDGSSNGKARYVVGPKDKVISTPYTSAQKTZLFAVISALQDFD  
QPLNIVSDSAYVHATKAIETATIKNITDTNIFSLFSLQKTRRNZNHPFFITHIRSH TN  
LPGPLSSGNHKVDTLVSLAII DAEQFHQLTHTNV SGLKHKYSLSWKQPKQIVQHCSQCQV  
LVLP TQSPGVNPRGLSPNAIWQMDVTHVPSFGK LAYVHVTVDTFSNFIWATCQTREAI SH  
VKKHMFSCFAVMEIPGELKTDNGPAYCSKAFKNFPDQWHIKHVTGIPYNPQGQAI VEKSN  
RTLKLQLLQKEGDKELSTHIIQLNLALLTLNFLNIPKSSSVTAAKKTFLWZPSHSPRK  
GSMVKDVQSTICSKVSI LMWGRGYACVSPGEHQSPVWIPTRHLKLWPE DACKKETEKFAE  
KTPEQETPNTSNHQKEKVTM

>HML8

QWKS DIPIWIZQWLLSKEKLEALTQLVSEHLQLGNVESSLFSWN SPVFLVKKKSGKWRMV  
TDLRAINAVIKPMGAVQPGIPAPALIPKNWPLIVIDLKDCFFHIALHKSECEKFAFTIPS  
INNQEPAARYQWKVLPQGMLNSLTICQLHVQVLSPVRAQFPKPYILHYIDDILIAAPTD  
KELIDCYQILSRCVTEAGLHITQGTIQQTTPVQYLG MVVDKQCIRPQKIQIRRDSLKTLN  
DFQKLLGNINYL RPNLGIPTYVLSNFLSMLLGDSDLRSPWTLTPEALLELEFVEERIQT T  
QLSRVQPFQPFQLLVFASLHSP TGLIVQHNDLVEWCFLPHSVLKTLCVYLDQIAILIGQA  
WCRILQISGFDPNVIVVPLNQLKVQAAFQHSVLWQIHLADFIGIIDNHYPKNKLFDFIKM  
TSWVVPKLT KDQPIPKAITVFTDGSSNGNAVIGPTDKLISTSYTSAQTAELIAVITALQD  
FPKPLNIVSDSTYVHATKN IETATIKHIDNSELASLFSRLQHAVCQHRHPFYITHIRSH  
TTLP GPMSAGNHKVDCLVSFTIQEAQEFHNLTHVNAAGLKDKFALS WKQAKFIVHSCPQC  
QVFVLPNQGPVNP RGLTANALWQMDVTRASSFGGLSYVHVSVDTFSGFIWATCQTGEGM  
THVKKHLYSCFAVLGLPYQIKIDYTAGYVSKAFDSFMQQWGISHITGIAYNPQGQAVVER  
ANRTLKTQLSKQSEQPKHDLTTPHSQLHLALFTLIFLNVPKDNTLTA AKRHYTGKKFSLN  
EDKPVLWKNSQTNTWEPGTIITWGRZYTCVSPGDHQSPVWVPTRRLKLQVNLTMKTTEKR  
RLCQRLPSDW

>HML6

RXSGFLMGVIDISPPPXALPLEWLSDKXXWVDQWPLXQEKLXQLQQLVKEQLDAGHIEES  
XSPWNSPVFVIPKSGRWRLLDLRAINAQIKPMGXLQQLPSPXAI XRDWPLVVIDLKD  
CFFTIP LHEKDKPRFAFSVPSINQREPVSRYQWRVLPQGMLNSPTLCQHFVQGALKEPRN  
MFPTAYIIHFMDDILLAAPTDQILHQLFRETKQAXTKWNLKIAPEKVQTTSPYHYLGTIV  
XERSVXPQKVVLCKDRLQTLNDFQQLLGXINWLPMLGIXXYQLTHLXQTLQGDSSLSNX  
WQXXKEAEXELXLVEQMXQQRHAXQLXXQKXLLXFILPXPSPHTGXLGXXXDXSVTVIEW  
LFXPNQTXKXXQVYLSLITQIVTMGXHRSKMLMGYXPXKIVXLDSQQXXXAWEMXXXWQ  
IAFAXFVGXIDXXXPSDKIXQFYKXHSFILPVI THHKPIXGGXYFTDGSSKGGXXXYGP  
KHTQXIMXSGVSAQXSEXIAVIQVLXL T ASDPINIVCDSAYVVNVASHIETATIKSTLXP  
ELLNLFRLRQQAI XSRAAPFHISHIRSH TQLPGPLSLGNDRADKLIGSVFQXQASHALL  
HQNTSALTRMFHLPXSQAXAIVQACPTCQHVPGVAPVEGCNPRXLAPNEIWQMDVTHIAA  
FGKLSYHVITIDYSHMLHATCQTGXTAGHXQXHCLSSFAHMGXPKQLKTDNGPAYVSHA  
FQNXLQLWAI THKTGIPYNPRGQGI ERAHQTLQXMLKKQKGGIGDQLPPQTKLHLALFT  
LNFLTPTGTD SKTPAEXHWQMLEGKRKVVYPKVLWKSXEEGQWKGPVDDL MWGXGYACVFTG

DGQTVVWVPSRCVRPWNGRLEEPMVANHGPPV

>HML9

NSPVFVI PKKSGKWGLLHDLRAINAIKPKMGALQQGLPSLAAFPDWPVVIDLIVFFT  
LLHQQDRPGYAFVSPVSNQREPVSCYQWKVLPQGVLSPTLYQNFVQALKEPCNVFPTG  
YVIHYMDDILLAAPTQDILHQLFRETKQALTKWNLKIAPEKVQTTSPYQYLGTIITERSV  
QPQKVVICRDLQTLNDFQQLSGDINWLHPMLGIATYZLKHLQTLQGDSSLDSPRQLTK  
EAEAEELZLVEQMLQQHATWLPQKPLLLFILPTSHSPTGLLGQFIHKSIVLEWLFYPI  
TVKSLQIYLSLITQLITIGRHRSKMFMGCDPDKIIVPLDSQQQATAWEMSTAWQITLTD  
VGIIDNHYP SDKILQFYEVHPFTLPVITHHKPIGRQTYFTDSSKGC AAIYGP KHTETI  
KTSGVSAQCSELVAVIQVLTALSPINIVCDSAYIVNVASHIETATIKSTLEPELYNLF  
LRLQQAVHSHAAPFHI SHICYHTQLPGPLSLGNNKADKLG SVFQQAQSSHAFLHQNTSA  
LTRMFHLPCSQAZAIAQAYPTCQPVPGVAPMEGCNPLGLAPYEIWQMDVTHIAAFGKLSY  
VHVTTDTYSHMLHVTCQTGETAGHVDHCLSPFAHMGVPTQZKTDNGPAYVSHAFQNFQL  
WAITHKTEIPYNPQGGIIEWAHQTLQCMLKKQKWGLGDQLPPQTKLHLALFTLNFLTPG  
MDIKTLAEZHWQMLEGKRKVYPKVLQKSPEEGQWKGPVDDLIIWGRGFACVFTGDGQSVWV  
PSRCVZPWNGRLEKPIWISTVGPAPPV RAMS

>HML5

VMATV IIPPLPLMRLSODPIWVDQWPLKGEKLR AHEFVEEQLKASHIEPSKRPWN S P I F  
IIPKKS GKZRLLDZHAINANLKPMPLEQV FSSPSVIPZDWHIIVIGLKYCICTIPFAE  
QDREKFVFIIPAINNERPAPRFHWKVLPEGMLNSPTMCQYHVNQALLLSRKEFPNCKTIH  
FMDDILLAAPMDPALLSLCASVVKNTQLRGLIIAPEKVQMS SPWKYLG YILTSWSVRPQK  
VKLNTSNLHTLN DYQKLLGNINWLCPTLGITTDKLNLF S I L K D N A A L D S P R Y L T P A A Q R  
EIEEVEQAISQRQLDHIDPWYSVQLSVFPTKHSPTGLVGM APELRFLEWVFLHTGTGP  
FSPYIQLVSKVIYSGHRRCNLLLGYPDIIRIPLSKKQCEAVLPLYIDLQTARSDYTGHI  
EPALPADKLLQLSCTSVLPLKIVQSPTPNALTLFTNGSGKHGKVAVVWRLHNSLTHSGF  
NSTQRAEVPLIITLETFTTQZPINIVSDSAYSVHLLQNL ETALIKSTLEPTLCALFLZLQH  
LLDQHTHPIFITHIRAYSQPLAYGNDAQDLQVCQSHQFFHQGWRNLSKQFQLTQRLA  
KQIILQCPDCQLIGTSPSTGVNPRGLEPNQLWQTNVTHIPEFGKLRVHI SVDTNSHLI  
SACAIPEGESTQYVIKHL L L L T F A C M E H P T K I K T D N G L A Y A S S Z F Q Q C H H I Z N I Q H S A G I L Y  
NPQQAIVDHTHSTLKNMLRKQKRGNM SKDPATPLAQALFTLN FZLNLDK FQSAVEKHFA  
KTSQDIKPAVLWKDVNSNVWRGPNELLTWGRGYACVHTPSGPLWIPRQHFEPYHGMARTQ  
PSTRNEENDPAGPTALDDAASSDDTSPGHYLGDAEEDNSGG

>Python-molurus

TNLWGRDLMSQFQTKLILQLMAVSAVLRLELQSQTPVWIDQWPLTVEKLTVLKQLVNEQL  
DNGHLEPSLSPYNTPVFVIKKKSGKWRL LHDLRVNAI IKPMGALQCGLPNPNLI PQSYD  
MMIIDLKDCFFSIPLHPKDKHIFAFTVPALNNSQPTSRYQWKVLPQGM LNSPTMCQYFVS  
QVLQPYRDKYSSFLVYHYMDGILVATPGPKGTVLKTLPHLQRILQQGGLHIAPDKVQLSS  
PFHYLGHKVLESHANPCLPNIQLPPAPTLLQLQYLG SINWIRPYIGLSTIQLSPLFTAL  
TKGKQPADVIPLQKEQLDAVKLINQALRTKWVDRMKDNL PFSLLLNTLTLPTGAVVQVT  
PSLLILEWIHLSHTPRATLTTKPAQFASLITKGR LRSKALAGVEPSVIYVPCSLSTWESL  
LAVSDHLQFALADWPGTVSCHPPDPDRVQLLRTPFIWQTPMSFPPIHDAVTVFADGSKK  
SGACAWQIDGQWHTKTTPQSSAQR AELYASILAFEAFPHQSFNLI L D S F Y V S Q I I S S I Y  
QAYLSPSIEPTLSLFLSLQHLISKRTHFFVVAHIRSHQPPFGILQEGNSVADAAAAAAS  
SSPLIFAFSSPTPWEHSYFHNK KALIKQFKI SATEATAILQQCPTCSKQAHSVPMGVN  
PRGTECNQI WQMNVTQYASFS PWKYLHVSIDTYSGFIMATPQRDEASKRIINH CIRTFAT  
LGRPKELKTDNGPGYTGSAAFAFCQKWGITHKFGIPYNSKGQAI IGRANQTLKHALDRYI  
ETKKGKPPSLPAVQDILNLCLYTLNFLNLTGLPATSAACRHFASQPAADHQ RPLVYYRCL  
PDPAWRGP AQLITWGRGYAAIQLPDKVLWVPGRCVRPCHLPLSPDAQDVPPPPHIRGLTG  
V

>gg01-chr7-5733782

PICLTWITDKSVWIEQWPLKKNVLDNVIKLVAKQLQKGHIQPSTSPWNTPIFIIKKKSGK  
YRL LHDLRV VNAQM QPIGALQGPLNPTMIPENWHLLIVDLKDCFFTTINIHPKDTSRFAF  
TVPATNKGAPAARYEWTVLPQGMKNSPTLCQLFVDVALEPIRKAWSHAVIYHYTDDILIA  
ZSRPFTTDQELYLKR TLQRKGLVIAPEKVQREAPWKYLGWVIAQSHVCPQKLT LHTDIQT  
LN D T Q K L L G D L Q W L W P V V G L L N D D L N S L R P L L K G T D P A A C I S V S P E Q Q Q S I E H L A Q T V V E  
RSVDRRDP SLPIDITVLLGZTQLLAALTQRKKKKG E Q A D I R V L E W L F T A L Q P R T T I Q Q T I  
DNLAELVHRGHKRVL SIAGEEPTIYLLVKHTDL DWYIQNSTELASSLSSGANLEICPL  
ALPVLKWM TQRRWLVI PKLSRAPLQNAITV FMDAGRKSRKAVAVVRGDTGSYKQPGDSLQ  
TLELSAVVWAF FNWPLQPLNVVSDSLYVVG L V E R V E D T R V R E L S N Q S L Y E L L T T L Q R V T L  
QRAITIRRERYSIHIRSHKWQEGLEGEGNRADDLVAVSVPVDRLVQAWEAHATFHQNR  
GLHKLYKISLNEARGIVRACPSCSNFSPGLGLEVNPRGLGPLEICQMDVTHIPEFSRLKY

VHVTVDITYSKFIWATVGEKVLHVIHHLTVCFAIMGLPKTFKTDNGPAYTSQGFGRFCEKW  
GVQHITGVLNSPAGQAIIVERANETLKRYVSRLSDVRDTQEHLARALFTVNYLCMYGEGEE  
TPAQVHSRVPVGNTPVSVVEYHNPRGTGIWERPAEVKYMGGWYVCAYTDRSTMGSGQMD  
>gg01-ChrU-163504869

PKLEHLLFLPVHCHMLLZCGILITKNHKTVTLPDSPHPLLQDLEQLGAEVKFESGKMKF  
KVKDDSF IKMLSLALITASEDSGIPEE I INQIYPGVWATEVPGHAKNASPIV IKVKQEAH  
PPRIKQYPLRAEDREEIQLIIDZFIKYGLLVECESKYNTPILSVKKSDWSYHIVQDLRAI  
NKIVDLYPLVANPYTLLTRLSNELAWFTVLDLKDFAFFCLPLSPESQLLFAFEWENPKSER  
RTQLTWTVLPQGFKNSTPIFGNQLAKGLEQWEHPSGKGVLLQYVDDFLIATETEELCIAW  
TISLLHFLGLMDTVSPQKAQVAKQAVYLYGYGITAGLRTLGTARKEAICQTPEPRTAKEL  
CMFLGMTGWCQLWIHNHNYGLLVKTLFALLKTNPNVLTWGGETRVRVFKLLKHELMQAPALGL  
PDTTKPFWLYSYEKQGIAGLVLAQDLGPYRRAYVYFSKQLDEVSKGWPGCLRAVAALVLN  
VQEARVEGWLHSQGGHGSFEQLEEQRPNPNWPSVGMMLTDVTSPLPIDITMLLGRTOQLLAAL  
TQREKKKGEQADIRVLEWLF TALQPRTTIQQTIDNLAELVRKRRKZVLSIAGEEPGTIYL  
PIKRTDLWDYI ZNSTELASSLLSSGANLEVRPLASPVLKWMTQRRWLVI SKLSRAPLQNA  
ITVFTDVGESHEKRWRRLVPSATVMLASCVSPLAHTDQLPDQGM TADAHQYDAVKWRLF  
TNTHSLYTLLELSCPLLIRPYWILTSYHNSLFGSYCLLIPSPSYLVYFVSKDSLSEQQHP  
FTMLRERPIPYSTYPRKAPT TTTTWCCEGQQWRHRLQLAQPGDSLQTLLELPAVVWAFNLWPL  
QSLNMVSDSLYVVG LVERVEDARVRELSNQRLYKLLPYKQGAIRRERYSI IHIRSHKWQE  
GLGEGNRADDLVAVSVPVDRVQAREAHATFHQNARGLHKLKYKISLNEARGIVRACPS  
SNFGPGLGLGVNPRGLGPLEIWQMDVTHIPEFGRLKYVHVTIDTHSKFIWATVQVGEKVF  
HVIRHFTVCFAIMELPKTLKTDNGPAYTSQGFGRFCEKWDVQHITGV PNSPTGQAIIVERA  
NQTLKRYVCR LSDVRDTQEHLARALFTVNYVYVLEKARKPLLSDTLTAIVQDLLVPLLV  
NSPZIPTAHLSCRTVQASVKQSLQSSVRRRSWTGLAQPLDLLHAVGAI EASDAQIMMN  
NPNPILQALTS LKYLHKFSFSSFP SALTTFPSTFTCQONIQQTLLNHSRGT

>HIV-1

TRANSPTRRELQVWGRDNNSPSEAGADRQGTVSFNFPQVTLWQRPLVTIKIGGQLKEALL  
DTGADDTVLEEMSLPGRWKPKMIGGIGGF IKVRQYDQILIEICGHKAIGTVLVGPTPVNI  
IGRNLLTQIGCTLNFPISPIETVPVKLPGMDGPKVKQWPLTEEKIKALVEICTEMEKEG  
KISKIGPENPYNTPVFAIKKKDSTKWRKLVDFRELNKRTQDFWEVQLGIPHPAGLKKKKS  
VTVLDVGDAYFSVPLDEDFRKYTAFTIPI SINNETPGIRYQYNVLPQGWKGS PAIFQSSMT  
KILEPFRKQNPDI VIYQYMDDLVYGS DLEIGQHRTKIEELRQHLLRWGLTTPDKKHQKEP  
PFLWMGYELHPDKWTVQPIVLP EKDSWTVNDIQKLVGKLNWASQIYPGIKVRQLCKLLRG  
TKALTEVIPLTEEALELAENREILKEPVHGVYDPSKDLIAEIQKQGQGWTYQIYQEP  
FKNLKTGKYARMGAHTNDVKQLTEAVQKITTESIVIWGKTPKFKLPIQKETWETWTEY  
WQATWIPEWEFVNTPPLV KLWYQLEKEPIVGAETFYVDGAANRET KLKAGYVTNRGRQK  
VVTLTDTTINQKTELQAIY LALQDSGLEVNIVTDSQYALGIIQAQPDQSESELVNQIIEQL  
IKKEKVYLA WVP AHKGIGGNEQVDKLVSAGIRKVLFLDGDIDKAQDEHEKYHSNWRAMASD  
FNLPPVVAKEIVASC DKCQLKGEAMHGQVDCSPGIWQLDCTHLEGK VILVAVHVASGYIE  
AEVIPAETGQETAYFLLKLAGRWPVKTIHTDNGSNFTGATVRAACW WAGIKQEFGIPYNP  
QSQGVVESMNKELKKIIGQVRDQA EHLKTAVQMAVF IHNFKRKGIGGYSAGERIVDIIA  
TDIQTKELQKQITKI QNFRVYRDSRNPLWKGP AKLLWKGEGAVVIQDNSDIKVVPRRKA  
KIIRDYGKQ MAGDDCVASRQDED

>HIV-2

PSGADTINSTSGRSSSGTVGEIYAAREKAEGAEGETIQRGDGGLAAPRAERDTSQRGDRGL  
AAPQFSLWKR PVVTAYIEDQPVEVLLDTGADDSIVAGIELGDNYTPKIVGGIGGFINTKE  
YKNVEIKVLNKRVRATIMTGDTPINIFGRNILTALGMSLNLPAKIEPIKVT LKPGKDG  
RLKQWPLTKKEKIEALKEICEKMEKEGQLEEAPPTNPNYNTPTFAIKKKDKNKWRMLIDFRE  
LNKVTQDFTEIQLGIPHPAGLAKKKRISILDVGDAYFSIPLHEDFRQYTAFTLPAVNME  
PGKRYIYKVL PQGWKGS PAIFQYTM RQVLEPFRKANPDVILIQYMDDILIASDR TGLEHD  
KVVQLKELLNGLGFSTPDEK FQKDPFQWMC ELWPTKWK LQKLQLPQKDIWTVNDIQK  
LVGVLN WAAQIYSGIKTKHLCLIRGKMTLTEE VQWTELAEEAELEENKII LSQE QEGYYY  
QEEKELEATI QKSQGHQWYKIHQEEKILKVGKYAKIKNTH TNGVRLLAQVVQKIGKEAL  
VIWGRIPKFHLPVERETWEQWWDNYWQVTWIPEWDFVSTPPLVRLTFNLVGDPIPGAETF  
YTDGSCNRQSKEGKAGYVTRGKDKVKVLEQTTNQQAELEVFRMALADSGPKVNIIVDSQ  
YVMGIVAGQPTES ENRIVNQIIEEMIKKEAVYVAWVPAHKGIGGNQEVDHLVSQGIRQVL  
FLEKIEPAQEEHEKYHSIIKELTHKFGIPLVARQIVNSCAQCQKGEA IHGQVNAEIGV  
WQMDYTHLEGKIIIVAVHVASGFIEAEVIPQESGRQTALFLLKLASRWPITHLHTDNGPN  
FTSQEVKMWAVWVGIEQSFGVPYNPQSQGVVEAMNHHLKNQISRIREQANT IETIVLMAV  
HCMNFKRGGIGDMTPAERLINMITTEQEIQFLQRKNSNFKNFQVY YREGRDQLWKGPGE  
LLWKGEGAVIVKVGTDIKVPPRRKAKIIRDYGGRQELDSSPHLEGAREDGEMACPCQVPE

IQNKRRPGGALCSPQGGMGVLDLQQGNIPTTRKKSSRNTGILEPNTRKRMALLSCSKIN  
LVYRKVLDRCYPRLCRHPNT

>Visna

MPSLWKKRTYAKGLPAEETAGKQOEGATCGAVRAPYVVTEAPPKIEIKVGTRWKKLLVDT  
GADKTIVTSHDMSGIPKGRILLQIGIGGIEGEKWEQVHLQYKDKIIRGTIVVLATSPVEV  
LGRDNMRELIGLIMANLEEKKIPSTRVRLKEGCKGPHIAQWPLTQEKLEGLKEIVDRLE  
KEGKVGRRAPPHWTCNTPIFCIKKKSGKWRMLIDFRELNKQTEDLAEALGLPHPGGLQRK  
KHVTILDIGDAYFTIPLYEPYRQYTCFTMLSPNNLGPVRYWVLPQGWKLSPAVYQFT  
MQKILRGWIEEHPMIQFGIYMDDIYIGSDLGLEEHRGIVNELASYIAQYGFMLPEDKRQE  
GYPAKWLGFEHLPEKWKFKHTLPEITEGPIITLNLQKLVDLVWRQSLIGKSI PNILKL  
MEGDRALQSERYIESIHVREWEACRQKLEMEGNYDEEKDIYGQLDWGNKAIEYIVFQE  
KGKPLWVNVVHSIKNLSQAQQI I KAAQKLTQEV I RTGKIPWILLPGREEDWILELQMGN  
INWMPFSWVSCYKGSVRWKKRNVIAEVVPGPTYTDDGGKKNRGSGLGYITSTGEKFR IHEE  
GTNQQLELRAIEEACKQGPEKMNI V TDSRYAYEFMLRNWDEEVIRNPIQARIMELVHNKE  
KIGVHWVPGHKGIPQNEEIDRYISEIFLAKEGRGILQKRAEDAGYDLICPQEISIPAGQV  
KR I AIDLKINLKKDQWAMIGTKSSFANKGVFVQGGI IDSGYQGTIQVVIYNSNNKEVVIP  
QGRKFAQLILMPLIHEELEPWGETRKTTERGEQGFSTGMYWIENIPLAEEHNKWHQDAV  
SLHLEFGIPRTAAEDIVQQCDVCQENKMPSTLRGSNKRGI DHWQVDYTHYEDKIILVWVE  
TNSGLIYAERVKGETGQEFRVQTMKWYAMFAPKSLQSDNGPAFVAESTQLLMKYLGI EHT  
TGI PWN PQS QALVERTHQ TLKNTLEKLI PMFNAFESALAGTLITLNIKRKGGLTSPMDI  
FIFNKEQQRIQQQSKSKQEKIRFCYYRTRKRGHPEWQGP TQVLWGGDGAIVVKDRGTDR  
YLVIANKDVKFIPPPKEIQKE

>EIAV

MQKCSKKREARSGREAPETNFPDTEESAQQICCTRDSSDSKSVPRSERNKKGIQCQEGE  
SSRGSQPGQFVGVTYNLEKRPTTIVLINDTPLNVLLDTGADTSVLTTHAHYNRLKYRGRKY  
QGTGIIGVGGNVETFTSPVTIKKKGRHIKTRMLVADIPVTILGRDILQDLGAKLVLAQLS  
KEIKFRKIELKEGTMGPKIPQWPLTKEKLEGAKEIVQRLLESEGKISEASDNNPYNSPIFV  
IKKRSKWRLQLDLRELNKTQVVGTEISRGLPHPGGLIKCKHMTVLDIGDAYFTIPLDPE  
FRPYTAFTIPI SINHQEPDKRYVWVKCLPQGFVLSPIYIYQKTLQEILQPFRRERYPEVQLYQY  
MDDLFMGSNGSKKHKELI I ELRAILLEKGFETPDDKLQEVPPYSWLGYQLCPENWKVQK  
MQLDMVKNPTLNDVQKLMGNITWSSGIPGLTVKHIAATTKGCLELNQKVIWTEEAQKEL  
EENNEKIKNAQGLQYYNPEEEMLCEVEITKNYEATYVIKQSQGILWAGKKIMKANKGWST  
VKNLMLLLQHVATESITRVGKCPFTFKVPFTKEQVMWEMQKGWYYSWLPEIVYTHQVVDH  
WRMKLVEEPTSGITITYTDGGKQNGEGIAAYVTSNGRTKQKRLGPVTHQVAERMAIQMALE  
DTRDKQVNI V TDSYCWKNITEGLGLEGPQSPWWPIIQNIREKEIVYFAWVPGHKG IYGN  
QLADEAAKIKEEIMLAYQGTQIKEKREDEDAGFDLCPYDIDIMIPVSDTKI IPTDVKI QVPP  
NSFGWVTGKSSMAKQGLLINGGI IDEGYTGEIQVIC TNIGKSNIKLIEGQKFAQLIILQH  
HSNSRQPW DENKISQRGDKGFGSTGVFWVENIQEAQDEHENWHTSPKILARNYKIPLTVA  
KQITQECPHCTKQSGPAGCVMRSPNHWQADCTHLDNKIILTFVESNSGYIHATLLSKEN  
ALCTSLAILEWARLFSPKSLHTDNGTNFVAEPVNNLLKFLKIAHTTGIPYHPESQGIVER  
ANRTLKEKIQSHRDNTQTLEAALQLALITCNKGRESMGGQTPWEVFTINQAQVIHEKLLL  
QQAQSSKFCFYKIPGEHDWKGPTRVLWKG DGAVVNDGKGI IAVPLTRTKLLIKPNZV  
LLQEARPNYHCQLCFRLSLGIDYLDASLRKKNKQRLKAIQGRQPQYLLZGLIYGSIWZR  
GNMVSIAFYHGQIPGGISTPITQQSEKSCENTMFQPYCYNND SKNSMAESKEARDQEMN  
LKEESKEEKRRNDWKKIGMFLCLAGTTGGILWWEGLPQQHYIGLVAIGRLNGSGQSN  
AIECWGSFPGCRPFQNYFSYETNRSMHMDNNTATLLEAYHREITFIYKSSCTDSDHCQEY  
QCKKVNLSNSSSNVVEDVMNTAEYWGFKWLECNQ TENFKTILVPENEMVNINDTDTW  
IPKGCNETWARVKRCPIDILYGIHPIRLCVQPPFFLVQEKGIADTSRIGNCGPTIFLGV  
EDNKGVVRGDYTACNVRRLNINRKDYTG IYQVPIFYTCTFTNITSCNNEPIIX

>HTLV-1

AKRPPVILPIQAPAVLGLLEHLRPPPEISQFPLNPERLQALQHLVRKALEAGHIEPYTGPG  
NNPVFPVKKANGTWRFI HDLRATNSLTIDLSSSSPGPPDLSSLPTTLAHLQIDLDKDAFF  
QIPLPKQFQPYFAFTVPQQCNYPGTRYAWRVLPQGFKNSTPLFEMQLAHILQPIRQAFP  
QCTILQYMDLILLASPSHADLQLLSEATMASLISHGLPVSENKTQQTPTGKIFLQGIISP  
NHLTYDAVPKVP IRSRWALPELQALLGEIQWVSKGTPTLRQPLHSLYCALQRHTDPRDQI  
YLNPSQVQSLVQLRQALSQNCRSRLVQTLPLLGAIMLTLTGTTTTVVFQSKQWPLVWLHA  
PLPHTSQCPWGQLLASAVLLDKYTLSYGLLCQTIHNNISTQT FNQFIQTS DHPSVPI  
LHHSRHFKNLGAQTGELWNTFLKTTAPLAPVKALMPVFTLSPVIINTAPCLFSDGSTSQA  
AYILWDKHILSQRSFPLPPPHKSAQRAELGLLHGLSSARSWRCLNIFLDSKYLYHYLRT  
LALGTFQGRSSQAPFQALLPRLLSRKVVYLHHVRSHTNLPDPI SRLNALT DALLITPVLQ  
LSPADLHSFTHCQTALT LQGATTT EASNILRSCHACRKNPQHQPQGHIRRGLLPNHI

WQGDITHFYKNTLYRLHVWVDTFSGAISATQKRKETSSEAISSLLQAIAYLGKPSYINT  
DNGPAYISQDFLNMCTSLAIRHTTHVPYNPTSSGLVERSNGILKTLLYKYFTDKPDLPM  
NALSIALWTINHLNVLTNCHKTRWQLHHSRQLQPI PETHSLSNKQTHWYFYKLPGLNSRQ  
WKGPEALQEAAGAALIPVSASSAQWIPWRLLKRAACPRPVGGPADPKEKDHQHHG

>HTLV-2

HRSRPGYTPDTRARAGKAPRHPDPRRQWANQHPVQTPPNPPTHILALPKVPRYPFLPL  
RHPQQMDHHWKGRPTTMPGASIPRRPQPPP IAANSHSKHHRPRTSPSTSPSGPISFKPE  
RLQALNDLVS KALEAGHIEPYS GPGNNPVFVKKPNGKWRFIHDLRATNAITTTLTSPSP  
GPPDLTSLPTALPHLQTDIDTDAFFQIPLPKQYQPYFAFTIPQPCNYGPGTRYAWTVLPQ  
GFKNSPTLFEQQLAAVLNPMRKMFPSTIVQYMDILLASPTNEELQQLSQTTLQALTT  
GLPISQEKTOQTPGQIRFLGQVISPNHITYESTPTIPIKSQWTLTELQVILGEIQWVSKG  
TPILRKHLQSLYSALHGYRDPRACTITLTPQQHLALHAIQQALQHNCRGRNLNPLPLGLI  
SLSTSGTTSVIFQPKQNWPLAWLHTPHPPSTLCPWGHLACTILTLDKYTLQHYGQLCQS  
FHHNMSKQALCDFLRNSPHPSVGILIHMMGRFHNLSQPSGPWKTLHLPTLLQEPRLLR  
PIFTLSPVVLDTAPCLFSDGSPQKAAYVLWDQITILQQDITPLPSHETHSAQKGELLALIC  
GLRAAKPWPSLNI FLDSKYLIKYLHSLAIGAF LGTSAHQTLQAALPPLLQGKTIYLHHR  
SHTNLPDP ISTFNEYTDSLILAPLVPLTPQGLHGLTHCNQALVSFGATPREAKSLVQTC  
HTCQTINSQHMPRGYIRRGLLPNHIWQGDVTHYKYYKYCYLHVWVDTFSGAVSVSCKK  
KETS CETISAVLQAI SLLGKPLHINTDNGPAFLSQEFQEFCTSYRIKHSTHIPYNPTSSG  
LVERTNGVIKNNLNKYLLDCPNLPLDNAIHKALWTLNQLNVMNPSGKTRWQIHHSPLPP  
IPEASTPPKPPKWFYKLPGLTNQRWKGPLQSLQEAAGAALLSIDGSPRWIPWRFLKKA  
ACPRPDASELAEHAATDHQHHG

>BLV

LERLQALQDLVHRSLEAGYISPWDGPGNNPVFPVRKPNGTWRVFDLRLATNALTKPIPAL  
SPGPPDLTAIPHTLPHIICLDLKDFAFFQIPVEDRFRSYFAFTLPTPGGLQPHRRFAWRVL  
PQGFINSALFERALQEPRLQVSAAFS QSLLSVSYMDLILIASPTTEEQRSQYQALAAARL  
DLGFVASEKTRQTPSPVPFPGMVHNQIVTYQSLPTLQISSPISLHQLQAVLGDLDQWVS  
RGTPTTRRPLQLLYSSLK GIDDPRAI IQLSPEQLQGI AELRQALSHNARSRYNEQEPLLA  
YVHLTRAGSTLVLFQKGAQFPLAYFQTPLTDNQASPWGLLLLLLGCQYLQTQALS SYAKPI  
LKYHNLNPKTSLDNWIQSSEDPRVQELLQLWPQISSQGIQPPGPWKTLITRAEVFLTPQF  
SPEPIPAALCLFSDGATGRGAYCLWKDHLDFQAVPAPESAQKGELAGLLAGLAAAPPEP  
LNIWVDSKYLYSLLR TLVLGAWLQDPVPVSYALLYKSLLRHPAIFVGHVRS SHSSASHPIA  
SLNNYVDQLLPLETPEQWHKLTHCNSRALS RWPNPRI SAWDPRSPATLCETCQRLNPTGG  
GKMRTIQRGWAPNHIWQADITHYKYKQFTYALHVFVDTYSGATHASAKRGLTTQMTIEGL  
LEAIVHLGRPKLNTDQGANYSKTFVRFCCQFGISLSHHVPYNPTSSGLVERTNGLLKL  
LLSKYHLDEPHLPMTQALS RALWTHNQINLLPILKTRWELHHSPLAVI SEGGETPKGSD  
KLFLYKLPQNNRRWLGPLALVEASGGALLATNPPVWVWWRLLKAFKCPKNDGPEDAHN  
RSSDG

>HSRV

MNTPVYPVPKPDGRWRMVL DYREVNKTIPLTAAQNQHSAGILATIVRQKYKTTLDLANGF  
WAHPITPESYWLTAFTWQ GKQYCWTRL PQGFLNSPALFTADVVDLLKEIPNVQVYVDDIY  
LSHDDPKEHVQOLEKVFQILLQAGYVVS LKKSEIGQKTVEFLGFNITKEGRGLTDTFKTK  
LLNITPPKDLKQLQSILGLLNFARNFIPNFAELVQPLYNLIASAKGKYEIWESEENTKQLN  
MVEALNTASNTALERLEQRLV IKNVTPSAGYVRYNETGKKPIMYLN YVFSKAELKFS  
MLEKLLT'TMHKALIKAMDLAGQEILVYSPIVSMTKIQKTPLPERKALPIRWITWMTYLE  
DPRIQFH YDKTLP ELKHIPDVYTSSQSPVKHPSQYEGVFYTDGSAIKSPDPTKSNNAGMG  
IVHATYKPEYQVLNQWSIPLGNHTAQMAEIAAVEFACKKALKIPGPVLVITDSFYVAESA  
NKELPYWKSNGFVNNKKKPLKHISKWKSIAECLSMKPDITIQHEKGISLQIPVFIKGN  
LADKLCGGMPLETRENZEESITGKEVKNLVTQILLLLIDVPGMRDTRFLNCPHSLPLTS  
NAGLLKHCLMAGKWSPKAEMIILAAERSEHZQRZLRMKLEKGGKVDIVTSLTQEV TQMD  
PSKSHRQZKCVSTLYNII SAZAI EAFYTSVAVSQSTKQZZCNHKEVVZNR LISLLVI ZKI  
IZDKVZGLRYEVCGSTRRVTRKSTVIGHNTSKVARGKVKZDRIFPZRRQLFIHZGZCFKE  
YYSNRLIVLTMMEIVYKDSFZIVR

>HFV

MNPLQLLQPLPAEIKGTKLLAHWDSGATITCIPESFLEDEQPIKKTILKTIHGEKQQNVY  
YVTFKVKGRKVEAEVIASPYEYI LLSPTDVPWLTQQPLQLTILVPLQEYQEKILSKTALP  
EDQKQQLKTLFVKYDNLWQHWHENQVGHKIRPHNIATGDYPPRPQKQYPINPKAKPSIQI  
VIDDLLKQGVLT PQNSTMNTPVYVVPKPDGRWRMVL DYREVNKTIPLTAAQNQHSAGILA  
TIVRQKYKTTLDLANGFWAHPITPESYWLTAFTWQ GKQYCWTRL PQGFLNSPALFTADV  
DLLKEIPNVQVYVDDIYLSHDDPKEHVQOLEKVFQILLQAGYVVS LKKSEIGQKTVEFLG  
FNITKEGRGLTDTFKTKLLNITPPKDLKQLQSILGLLNFARNFIPNFAELVQPLYNLIAS



AKGKYIEWSEENTKQLNMVIEALNTASNLEERLPEQRLVIKVNTSPSAGYVRYNETGKK  
PIMYLNIVFSKAELKFSMLEKLLTMMHKALIKAMDLAMGQEILVYSPIVSMTKIQKTPLP  
ERKALPIRWITWMTYLEDPRIQFHYDKTLPKHIIPDVYTSSQSPVKHPSQYEGVFYTDG  
SAIKSPDPTKSNNAGMGIVHATYKPEYQVLNQWSIPLGNHTAQMAEIAAVEFACKKALKI  
PGPVLVITDSFYVAESANKELPYWKSNGFVNNKKKPLKHI SKWKSIAECLSMKPDITIQH  
EKGISLQIPVFIKGNALADKLATQGSYVNCNTKKPNLDAELDQLLQGHYIKGYPKQYT  
YFLEDGKVKVSRPEGVKIIPPQSDRQKIVLQAHNLAHTGREATLLKIANLYWPNMRKDV  
VKQLGRCQQCLITNASNKASGPILRPDRPQKPFDKFFIDYIGPLPPSQGYLYVLVVVDGM  
TGF'TWLYPTKAPSTSATVKSLLNLVTSIAIPKVIHSDQGAFTSSTFAEWAKERGIHLEFS  
TPYHPQSGSKVERKNSDIKRLLTLLVGRPTKWDLLPVVQLALNNTYSPVLKYTPHQLL  
FGIDSNTPFANQD'TLDTREEELSLQEI RTSLYHPSTPPASSRSWSPVVGQLVQERVAR  
PASLRPRWHKPS'TVLKVLNPR'TVVILDHLGNNRTV SIDNLKPTSHQNGTTNDTATMDHLE  
KNE

>HERVL66

QEEARGICHLYTNSWSVANGLT'TWMPQWQRNKWLI GNKEVWGKQYWEDISILAHTTITV  
FHVDAHASLLSLDRFNQADQQAISTITANSDEADWAAITQWVHHQCGHLGVQGM  
AWGVQRRISLPQDAVQ'TILSQ'TTCQQLKTKPIQRAMGHIHRGKMPGQICQMDYICPLP  
LSKGCQYICTAVD'TYSGLLVACAYANANQINTIKTLNILILYGVPIQIQTDNGSHFKGE  
AVQ'TFAAQDGI EWIFHIPIPHLQAAGLTERMNELLNKQLKVLGQKLEKWKDHLFDTLQNL  
NNWRLT'TSETPVSQLT'PHLQIAKCASVVQPLSLKFWKIHPEAILPWKSTREATGLDLHS  
FKSGIIPAQSTYMVASGLG

>SnRV

MASNKWFVYSDEPTKVIKRDKSKEKDETKKKKIKTEQNSDAAYETPGTAPVQKPLETT  
PEAELEKVLKGLEEWGYKALEKKRDP ELWPNQEGLEDEYLFGRGWVQGLADSKKALEKNM  
EKFVPLFVVTMSQAVPYWRQ'TMQARNQNGKKQKNRIAELEKEVADLTSAGRGADQVIAGM  
DKELKKTAEKYQAKLEELEQLAAMTVEKEELESQVEGLKESLVEAETKKVSLMEVLTMP  
TRSKGPKKRGPDLKQIRSLHVMADSLGMDSDGIDWDWLRQAWDYEGDEDPHVKEAEAAA  
WRERQTSQPSQPSQLRPFVAAGNGHREDQWRPLT'VTELPAAVTAVGGAWDP'TRETGSARW  
KKIVKAAEAIGWGTGDVCQVVTAMSPSWADVPPEIRNRVATEKEIKAWLMKQGGGGQGL  
LEF'TKLRQGP'TENPSNYLEKALELYLDSQPGDRDGNKDDPAFLQQATQGLLPWLKKAIVIL  
GGKNTSWQEMTSFCQRLWLVRDQFADKTGVSKARPIVRNEGPRPQQGHSKIVFGGNCRNC  
GKAGHMARDCWAKGGGQEGKGRQNTT'WKPKSGAIASAPPAESPYADCAKQLADIEKRLK  
DLT'TAGGGPKGPNPFHKPZGVAALAAPLCSLKGRPHVSVEIEGHKIECLVDTGAEVSLTS  
LQLQAQRFEQVVLGGKPVVGIADHVD'TTVGQVKGKGCWRI SQELAENILGNDLLRSLG  
LIVDQCNGVLWQASEGLGPDNWMMAETLRIYSIKSPGHYNLPELLATKDEQLADILWNNV  
EAFATHRND CGNLQGMTASFTADHPKMIKQYPVPDASHASIKETVEALLEQGVLRKCNST  
VNSAIWPVGKPDGSWRLTIDYRPLNSAVSCPYP'TVASTPELFAKLEKKYQVYSSLDISNG  
FWSIRLEEECQYLF'AFTFDTQQYTWTRLPQGFHASPGIFHQALYNGLASCKTAIESQGCK  
LLQYVDDILLMSEDRDHLRSLAILLQGLKDLGVKINPKKSHFCKDQVQYLVGNVVGADTR  
SLIDARSQ'LIRTLDIPLTVQGLRSALGLFNFCRAWIPEFSRKTQSLYDMLKGDCKSTDKL  
KWTE'DNLNFKLKLKDEVASACV'LGLPDPTLPFRHLIGIRQGHFLCSLVQKDDNGMWHVLG  
FYSRKMT'PVE'SNLGICEQYAECAAWAISACNLVSGFGRKIIVTSHSPVKF'ILQ'TTPNVSN  
QRLARWHRIL'TQEDITIETDASIQGW'FVPEPYEGEQHQC'RP'HD'TITWRVSTRAMPTGK  
WIDGSRYWDHDKGGYV'TGWAALREDKKNLGGALG'EHVSAQVAELVALREALR'LQRPLT  
LYTDSTYVLGICTKYLA'VWKR'RG'VMNADGSQISNQNILQE'IWQLIEHDSTQTLGIVKVA  
HTQRKCS'THEQQLNNDVDQPAKQYAKEEPNMSVIAPLQVYPLWIGLVPCKEPKLWENIQH  
HITKVDLPDFQKQLAEIMPQ'QDISHCTLAYFDKPSPEATKYHDKIKPYLGKGQQLTLCDT  
YIGKEGAA'ILGQLR'PDMQALHQAE'GEVHVS'LGTRAGHCPQELGTMLTNLLKSTQERIWQD  
PPVFKLHDET'GKVQGYVIK'TT'LG'KMTWIMNDHLV'TQSEQTEGRAKLSSTEGYALAQYH  
LYGHPSEESL'RKVLTKRFVWEDMGQHCKEITNTCLTCAKYKVL'RAGPPMGVGRSAEGPCQ  
KLQVDHVG'PLGPGTHGYRYL'TTMVDVYTGFWWAKPCRGPTT'GATIAALEEHSIWGV'PYS  
IQSDNGTAF'TSKAMQEWANTYGI EWKVGAIYHPQSQGKVERKHRLKDR'LRATHEGKNW  
VQALPSILLFINSMHPRDQFSAYELMTGRVPHLGGYHPHPLETAKEEEVRIFLRATHDCM  
QNKKEE'QLEKVTKAEAHSHWTQ'RS'PNLEPGCIVLVRKFTGDAFSPKWE'GPYVITETTKY  
AAKVQAMS'DKVTQHS'GWIHR'THLVLFPSQNKRWADPGNPGNQPEDDCTGKKGTVSTADMS  
P'TTST'TRDRGINMGTEQ'THRRRS'PRFQ'RGSDSPSGGQZ

>gg01-chr4-77338201

FRITAIAWTFPLPLTWT'TNPNVVKQWPLKRESLLQAHQLVQE'QYAQGHKLSTSPWNTP  
IFVIQKKS'GKYRLLHDLRAVNDQME'PMGALQ'PGLPNPAMLPEDWPILIDLKDCFF'TIAL  
HPQD'TKRFA'FTLPAINRGE'PDKRF'EWTVLPQGM'RNSPTICQLYVDAALQPLR'KEMPNTI  
IHYMDDILFAQQDP'FTEQ'QIERVKTVLA'EFSLVVAPEK'VQRSAPWKYLGWQITGKQVXXX



SLSPSEFQTLIVTKAHFASQNTQCWALEKGIQWNFHLXPXPQIAGXIERIMVSSNNSFX  
NXXPTNRPLNGSLSCQALISLNSRPFGLTPYNXKKRKPFFHPFLYLKRDMLHXYEDS  
YICGPNNVSSYLYKFSILPPSHKGWRPDRRHILSWDPLTIDCPIGQXAAHLIWDPSEPKL  
PPPKNLNPNIWVIRSGZLXRALPLIPSRKLLVLQGXSHRQCGLPRRETENPTZZXKIXFG  
DNNGINTISHNDKSRQHLLGNARQGXKSTSN

>gg01-chrU-52190725

PDTVGRDLITLFEVTIKNPEIPVRIKQYPLSQEGRQGLKPEIERLLKRGLLEPCLSPFNT  
PILPVRKPDGYSYRLVHDLREINKRTVTRFPVVPANPHTLLSQLSPENQWYSVIDLKDAFWA  
CPLKEECRDYFAFKWEDPETHRKQQLRWTVLPQGFTEPNLFGRALEQILRGYNLKGKIEIA  
LIQYVDDLLLAGDTLESVREASVTKLLGLQGLKIPNQSYNYRIHXXXXXXXXXXXXXXXXXXXX  
XXXXXXXXXXXXXXXXXXXXXXXXXXXXXXXXXXXXXXXXXXXXXXXXXXXXXXXXXXXXXXXXXXXX  
XXXXXXXXXXXXXXXXXXXXXXXXXXXXXXXXXXXXXXXXXXXXXXXXXXXXXXXXXXXXXXXXXXXX  
XXXXXXXXXXXXXXXXXXXXXXXXXXXXXXXXXXXXXXXXXXXXXXXXXXXXXXXXXXXXXXXXXXXX  
XXXXXXXXXXXXXXXXXXXXXXXXXXXXXXXXXXXXXXXXXXXXXXXXXXXXXXXXXXXXXXXXXXXX  
XXXXXXXXXXXXXXXXXXXXXXXXXXXXXXXXXXXXXXXXXXXXXXXXXXXXXXXXXXXXXXXXXXXX  
XXXXXXXXXXXXXXXXXXXXXXXXXXXXXXXXXXXXXXXXXXXXXXXXXXXXXXXXXXXXXXXXXXXX  
XXXXXXXXXXXXXXXXXXXXXXXXXXXXGIDVWVKIMYSLPGTGAECGLGGLAGSFMATEEFPQPLFTLQ  
RKTQLNLRDRCYNLLSCSFDIIAVFFSLSSTSHPLGKZGDIVLSTLILCLGCAITSS  
SWNSFGKLCGSLLSQHIMVSLYLNRRRRQQDLRRVLRSDLCDFRINSVIFTTZDPTCFLLZ  
CSGIWMAKHITLTKNHTZALEKTGLTAKFSIWSLFSCLMFLDLRKLVTLSRCELSELA  
LFAVIRRYVYKMRANFPZEIPNKTFDCMHFALFGKKEKEKKKKGKATYTSQMLVTFLVT  
SLNAPRKKSETMELSTVKISRKKKKMHKSZVKCLKTQNSDSVKLHDTWAYFKLISLIQLQ  
SLPRGWHLVWPCTSAHISANTEFAEEDLHTFSQEESQRSYLPDRDQSDLYVTGLGDIIL  
ITLPLGLAFPILKGTQSTKFNSPKKRWKQXGKKKKEK

>gg01-chr7-7163462

PVSKGEHKQMLLPGLSLNMDHLLTDAQSIWLNNGRYTEAHNPPHPVGSRVCMRNFLQEVEL  
KLKGFVSKKLRQZLGRMLTYRVDTYRVDNFFNRLLPQYRWTVLPQGFTEPILFGKVLEK  
ILESFQAQETVILLKYVDHLLLSGTEKSKVKETTNRHPNFLGKYGLRVPRNKSQYVVKV  
RYLGCIFYEGKWRNTNSDRVRELCDLSWFWRGLGAKLGSYNI STMALSKNWIPFSIAS  
HVSITGCRISLZGYLSLTAINIQSQRVAAPSKLLLIPLSIDLSLAMSPIWRASLPSRDKL  
LAPPSQQRSNQVTRFSFGRRVNSFPELWISVILRGZRIVIEISSSSLSSPCLLVFAFAFL  
GSEEVSPGSSSTSSTSYFFCLFVIDVRTPASISCLLQGLLTLVAVTHQIZLEDF  
PLWLAPQLGNSLQNSTIQSMVGTSQAPNKLYLLIYLSRTIPDSNAGSISRDPDQVQZ  
PMTLRVPTLLRFFLNLSVFPASQHSVLVLEETSSLARMERNTFKDIDNMRTSMTTSSVF  
RDKLRGKPGNRFESLKIQIIQHCIKAPGRCLHQCPYLVVYKHNSIARNYDVNYRPVTGKE  
HIAFNPLYAPTIKSKLIAGNCZREGGKQKQKQKQKQKQKQKQKQKQKQKQKQKQKQKQ  
MPCSHAVSGLKFIPTNVKSFRLPAFSTKNLSRSLYLDKSVPTGGQZAHGPPGFPKIKR  
SSGNLRRRTYFTNYDVGMDDTI
